# Supplementary material for: Nickel-catalyzed highly efficient chemoselective reduction of azoarenes to hydrazoarenes in water
Source: Royal Society of Chemistry journal article supplement (doi:10.1039/d4nj03477e), 2024-01-01
Supplement: d4nj03477e1.pdf [file d4nj03477e1.pdf]

## **Nickel-Catalyzed Highly Efficient Chemoselective Reduction of Azoarenes to Hydrazoarenes in Water**

Dawei Gong,<sup>\*,[a]</sup> Qixuan Li,<sup>[a]</sup> Yufei Li,<sup>[a]</sup> Qinghua Yang,<sup>[a]</sup> Caiyu Gao,<sup>[a]</sup> Jiku Wang,<sup>\*,[a]</sup> and Lina Zhao <sup>\*,[a]</sup>

<sup>a</sup> Key Laboratory of Preparation and Application of Environmental Friendly Materials, Ministry of Education, College of Chemistry, Jilin Normal University, Changchun, 130103, P.R. of China

Email: dawei.gong@jlnu.edu.cn

## Contents

|                                   |     |
|-----------------------------------|-----|
| 1. <b>General Procedure</b> ..... | S3  |
| 2. <b>NMR data</b> .....          | S5  |
| 3. <b>NMR Spectra</b> .....       | S10 |

## 1. General Procedure

**General Procedure for Transfer Hydrogenation of Azoarenes.** Ni complexes **1a-1e** were prepared as previously described.<sup>[1-2]</sup> A solution of Ni-catalyst, azoarenes (27.3 mg, 0.15 mmol, 1.0 equiv.),  $\text{NH}_3\text{BH}_3$  (1.5-2.0 equiv.),  $\text{H}_2\text{O}$  (0.5 mL) and THF (0.05 mL) were reacting under an  $\text{N}_2$  atmosphere at 60 °C for 20 min. Then the solution was quenched saturated  $\text{K}_2\text{CO}_3$  until the mixture became colourless. The mixture was extracted with EtOAc (3 mL x 3) and reduced in vacuo to give the hydrazoarenes products.

**Transfer Hydrogenation of Azoarenes with  $\text{NH}_3\text{BH}_3$  in THF.** A solution of **1a** (5 mol%, 2.3 mg), azoarenes (27.3 mg, 0.15 mmol, 1.0 equiv.),  $\text{NH}_3\text{BH}_3$  (7.0 mg, 0.22 mmol, 1.5 equiv.) and THF (0.5 mL) were reacting under an  $\text{N}_2$  atmosphere at 60 °C for 20 min. After cooling to RT, the mixture was reduced in vacuo. No product was observed by TLC and  $^1\text{H}$  NMR.

**Transfer Hydrogenation of Azoarenes with  $\text{ND}_3\text{BH}_3$ .** A solution of **1a** (5 mol%, 2.3 mg), azoarenes (27.3 mg, 0.15 mmol, 1.0 equiv.),  $\text{ND}_3\text{BH}_3$  (7.0 mg, 0.22 mmol, 1.5 equiv.),  $\text{H}_2\text{O}$  (0.5 mL) and THF (0.05 mL) were reacting under an  $\text{N}_2$  atmosphere at 60 °C for 20 min. After cooling to RT, the mixture was extracted with EtOAc (3 mL x 3) and reduced in vacuo to give the hydrazoarenes products.

**Transfer Hydrogenation of Azoarenes in  $\text{D}_2\text{O}$ .** A solution of **1a** (5 mol%, 2.3 mg), azoarenes (27.3 mg, 0.15 mmol, 1.0 equiv.),  $\text{NH}_3\text{BH}_3$  (7.0 mg, 0.22 mmol, 1.5 equiv.) and  $\text{D}_2\text{O}$  (0.5 mL) were reacting under an  $\text{N}_2$  atmosphere at 100 °C for 20 min. After cooling to RT, the mixture was extracted with EtOAc (3 mL x 3) and reduced in vacuo to give the hydrazoarenes products. The product was identified by  $^1\text{H}$  NMR. **3a-d1**:  $^1\text{H}$  NMR (400 MHz,  $\text{CDCl}_3$ , ppm): 7.25-7.21 (m, 4H), 6.88-6.83 (m, 6H), 5.62 (s, 1.03 H).

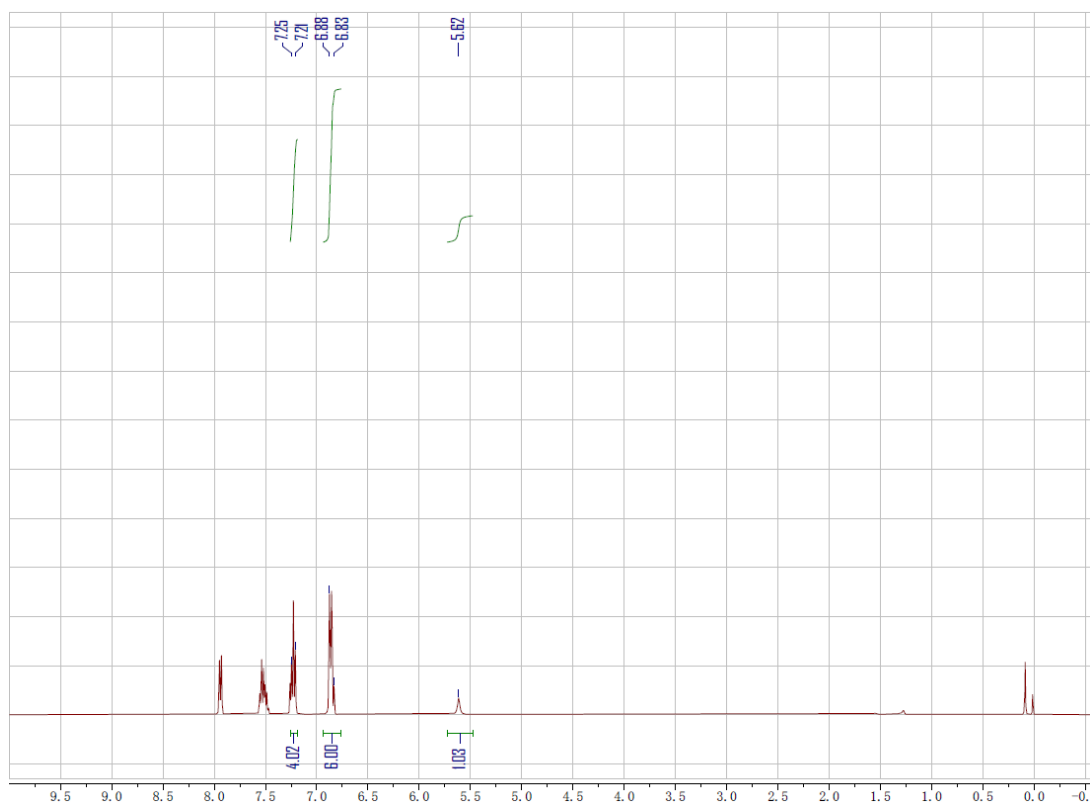

Figure S1. <sup>1</sup>H NMR Spectrum of **3a-d1**

## 2. NMR data

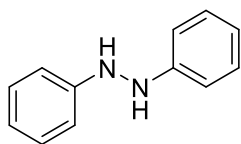

**1,2-diphenylhydrazine (3a)**<sup>[3]</sup>: White powder (26.3mg, 95%). <sup>1</sup>H NMR (400 MHz, CDCl<sub>3</sub>, ppm): 7.29-7.25 (m, 4H), 6.91-6.87 (m, 6H), 5.64 (s, 2H). <sup>13</sup>C NMR (100 MHz, CDCl<sub>3</sub>, ppm): 148.8, 129.4, 119.9, 112.3.

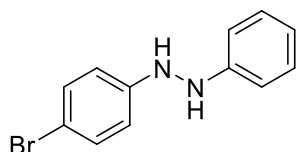

**1-(4-bromophenyl)-2-phenylhydrazine (3b)**<sup>[3]</sup>: White powder (37.9mg, 96%). <sup>1</sup>H NMR (400 MHz, CDCl<sub>3</sub>, ppm): 7.34-7.32 (m, 2H), 7.28-7.24 (m, 2H), 6.91-6.83 (m, 3H), 6.79-6.77 (m, 2H), 5.65 (s, 2H). <sup>13</sup>C NMR (100 MHz, CDCl<sub>3</sub>, ppm): 148.3, 147.9, 132.1, 129.4, 120.2, 113.9, 112.3, 111.5.

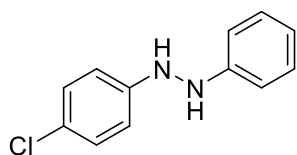

**1-(4-chlorophenyl)-2-phenylhydrazine (3c)**<sup>[3]</sup>: White powder (30.2 mg, 92%). <sup>1</sup>H NMR (400 MHz, CDCl<sub>3</sub>, ppm): 7.28-7.18 (m, 4H), 6.91-6.81 (m, 5H), 5.65 (s, 2H). <sup>13</sup>C NMR (100 MHz, CDCl<sub>3</sub>, ppm): 148.4, 147.4, 129.4, 129.2, 124.4, 120.2, 113.5, 112.3.

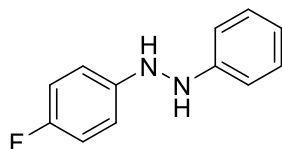

**1-(4-fluorophenyl)-2-phenylhydrazine (3d)**<sup>[3]</sup>: White powder (26.7 mg, 88%). <sup>1</sup>H NMR (400 MHz, CDCl<sub>3</sub>, ppm): 7.28-7.24 (m, 2H), 6.97-6.93 (m, 2H), 6.90-6.82 (m, 5H), 5.65 (s, 1H), 5.57 (s, 1H). <sup>13</sup>C NMR (100 MHz, CDCl<sub>3</sub>, ppm): 158.3, 155.9, 148.7, 145.0, 129.4, 120.0, 115.9, 115.7, 113.4, 112.3.

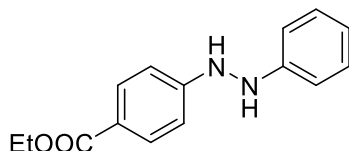

**ethyl 4-(2-phenylhydrazineyl)benzoate (3e)**<sup>[4]</sup>: White powder (34.2 mg, 89%). <sup>1</sup>H NMR (400 MHz, CDCl<sub>3</sub>, ppm): 7.95-7.93 (m, 2H), 7.28-7.23 (m, 2H), 6.91-6.83 (m, 5H), 5.98 (s, 1H), 5.75 (s, 1H), 4.37-4.32 (m, 2H), 1.38 (t, *J* = 7.1 Hz, 3H). <sup>13</sup>C NMR (100 MHz, CDCl<sub>3</sub>, ppm): 166.6, 152.7,

148.0, 131.5, 129.4, 121.4, 120.4, 112.4, 111.1, 60.4, 14.4.

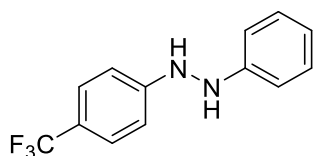

**1-phenyl-2-(4-(trifluoromethyl)phenyl)hydrazine (3f)**<sup>[3]</sup>: White powder (35.2 mg, 93%). <sup>1</sup>H NMR (400 MHz, CDCl<sub>3</sub>, ppm): 7.50-7.48 (m, 2H), 7.29-7.25 (m, 2H), 6.94-6.84 (m, 5H), 5.88 (s, 1H), 5.71 (s, 1H). <sup>13</sup>C NMR (100 MHz, CDCl<sub>3</sub>, ppm): 151.5, 148.0, 129.5, 126.85, 126.81, 126.77, 126.73, 120.4, 112.3, 111.5.

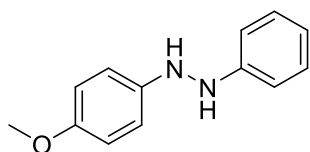

**1-(4-methoxyphenyl)-2-phenylhydrazine (3g)**<sup>[5]</sup>: White powder (29.2 mg, 91%). <sup>1</sup>H NMR (400 MHz, CDCl<sub>3</sub>, ppm): 7.28-7.17 (m, 2H), 6.89-6.86 (m, 2H), 6.83-6.81 (m, 3H), 6.79-6.77 (m, 1H), 6.73-6.68 (m, 1H), 5.63 (s, 1H), 5.48 (s, 1H), 3.78 (s, 3H). <sup>13</sup>C NMR (100 MHz, CDCl<sub>3</sub>, ppm): 153.7, 149.1, 142.7, 129.3, 119.7, 116.5, 115.1, 114.8, 113.7, 112.3, 55.7.

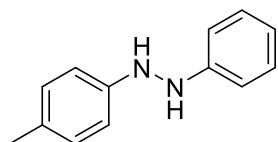

**1-phenyl-2-(p-tolyl)hydrazine (3h)**<sup>[4]</sup>: White powder (26.8 mg, 90%). <sup>1</sup>H NMR (400 MHz, CDCl<sub>3</sub>, ppm): 7.28-7.23 (m, 2H), 7.07-7.06 (m, 2H), 6.90-6.85 (m, 3H), 6.81-6.79 (m, 2H), 5.62 (s, 1H), 5.56 (s, 1H), 2.30 (s, 3H). <sup>13</sup>C NMR (100 MHz, CDCl<sub>3</sub>, ppm): 149.0, 146.5, 129.8, 129.3, 129.2, 119.8, 112.5, 112.3, 20.5.

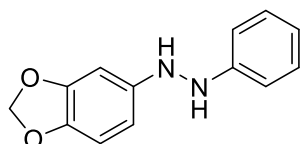

**1-(benzo[d][1,3]dioxol-5-yl)-2-phenylhydrazine (3i)**: Colorless oil (30.8 mg, 90%). <sup>1</sup>H NMR (400 MHz, CDCl<sub>3</sub>, ppm): 7.28-7.23 (m, 2H), 6.88-6.85 (m, 3H), 6.71-6.69 (m, 1H), 6.52 (s, 1H), 6.33-6.31 (m, 1H), 5.90 (s, 2H), 5.62 (s, 1H), 5.49 (s, 1H). <sup>13</sup>C NMR (100 MHz, CDCl<sub>3</sub>, ppm): 148.9, 148.5, 144.5, 141.3, 129.3, 119.9, 112.3, 108.6, 106.8, 104.1, 100.7, 98.1, 95.4.

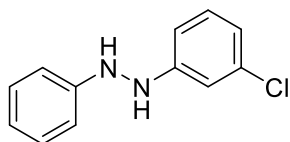

**1-(3-chlorophenyl)-2-phenylhydrazine (3j)**<sup>[4]</sup>: White powder (28.5 mg, 87%). <sup>1</sup>H NMR (400 MHz, CDCl<sub>3</sub>, ppm): 7.29-7.25 (m, 2H), 7.18-7.14 (m, 1H), 6.92-6.82 (m, 5H), 6.76-6.74 (m, 1H), 5.65 (s, 2H). <sup>13</sup>C NMR (100 MHz, CDCl<sub>3</sub>, ppm): 150.2, 148.3, 135.2, 130.4, 129.4, 120.2, 119.8, 112.3, 112.2, 110.4.

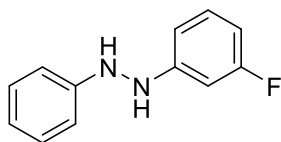

**1-(3-fluorophenyl)-2-phenylhydrazine (3k)**<sup>[3]</sup>: White powder (27.3 mg, 90%). <sup>1</sup>H NMR (400 MHz, CDCl<sub>3</sub>, ppm): 7.29-7.25 (m, 2H), 7.21-7.15 (m, 1H), 6.92-6.85 (m, 3H), 6.65-6.62 (m, 2H), 6.57-6.53 (m, 1H), 5.71 (s, 1H), 5.66 (s, 1H). <sup>13</sup>C NMR (100 MHz, CDCl<sub>3</sub>, ppm): 165.3, 162.9, 150.9, 150.8, 148.3, 130.6, 129.4, 120.2, 112.3, 107.8, 106.4, 99.6.

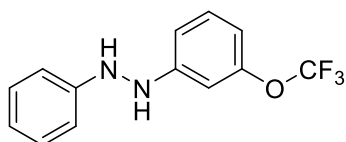

**1-phenyl-2-(3-(trifluoromethoxy)phenyl)hydrazine(3l)**<sup>[4]</sup>: Colorless oil (37.8 mg, 94%). <sup>1</sup>H NMR (400 MHz, CDCl<sub>3</sub>, ppm): 7.28-7.20 (m, 3H), 6.91-6.85 (m, 3H), 6.80-6.76 (m, 2H), 6.71-6.68 (m, 1H), 5.75 (s, 1H), 5.68 (s, 1H). <sup>13</sup>C NMR (100 MHz, CDCl<sub>3</sub>, ppm): 150.5, 148.2, 130.4, 129.4, 121.7, 120.3, 119.1, 112.3, 111.6, 110.3, 104.8.

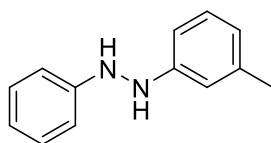

**1-phenyl-2-(m-tolyl)hydrazine (3m)**<sup>[4]</sup>: White powder (26.5 mg, 89%). <sup>1</sup>H NMR (400 MHz, CDCl<sub>3</sub>, ppm): 7.27-7.23 (m, 2H), 7.15-7.11 (m, 1H), 6.90-6.85 (m, 3H), 6.82-6.68 (m, 3H), 5.63 (s, 1H), 5.60 (s, 1H), 2.31 (s, 3H). <sup>13</sup>C NMR (100 MHz, CDCl<sub>3</sub>, ppm): 148.98, 148.94, 139.3, 129.3, 129.2, 120.8, 119.8, 112.9, 112.3, 109.4, 21.6.

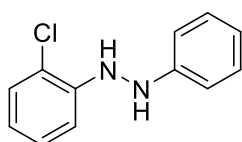

**1-(2-chlorophenyl)-2-phenylhydrazine (3n)**<sup>[3]</sup>: Colorless oil (31.2 mg, 95%). <sup>1</sup>H NMR (400 MHz, CDCl<sub>3</sub>, ppm): 7.32-7.30 (m, 1H), 7.29-7.24 (m, 2H), 7.17-7.13 (m, 1H), 7.07-7.05 (m, 1H), 6.90-6.77 (m, 4H), 6.22 (s, 1H), 5.68 (s, 1H). <sup>13</sup>C NMR (100 MHz, CDCl<sub>3</sub>, ppm): 148.2, 144.3, 129.4, 129.3, 127.9, 120.2, 119.8, 117.7, 113.0, 112.3.

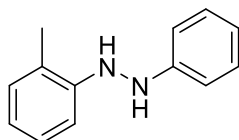

**1-phenyl-2-(o-tolyl)hydrazine (3o)**<sup>[4]</sup>: Colorless oil (26.8 mg, 90%). <sup>1</sup>H NMR (400 MHz, CDCl<sub>3</sub>, ppm): 7.26-7.23 (m, 2H), 7.14-7.10 (m, 2H), 6.98-6.95 (m, 1H), 6.89-6.78 (m, 4H), 5.62 (s, 1H), 5.59 (s, 1H), 2.27 (s, 3H). <sup>13</sup>C NMR (100 MHz, CDCl<sub>3</sub>, ppm): 148.8, 146.2, 130.4, 129.3, 129.0, 127.2, 119.9, 119.4, 112.3, 111.1, 17.1.

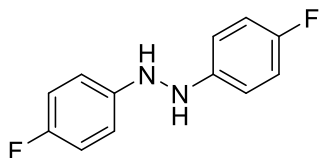

**1,2-bis(4-fluorophenyl)hydrazine (3p)**<sup>[3]</sup>: White powder (28.7 mg, 87%). <sup>1</sup>H NMR (400 MHz, CDCl<sub>3</sub>, ppm): 6.96-6.93 (m, 4H), 6.83-6.80 (m, 4H), 5.58 (s, 2H) <sup>13</sup>C NMR (100 MHz, CDCl<sub>3</sub>, ppm): 158.3, 156.0, 144.9, 144.8, 116.0, 115.7, 113.4, 113.3.

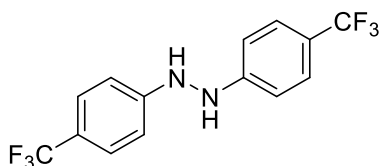

**1,2-bis(4-(trifluoromethyl)phenyl)hydrazine (3q)**<sup>[4]</sup>: White powder (45.6 mg, 95%). <sup>1</sup>H NMR (400 MHz, CDCl<sub>3</sub>, ppm): 7.51-7.49 (m, 4H), 6.91-6.89 (m, 4H), 5.98 (s, 2H). <sup>13</sup>C NMR (100 MHz, CDCl<sub>3</sub>, ppm): 150.7, 126.95, 126.91, 126.87, 126.84, 125.9, 123.2, 122.2, 121.9, 111.6.

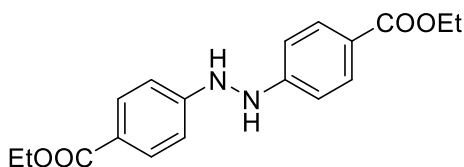

**diethyl 4,4'-(hydrazine-1,2-diyl)dibenzoate (3r)**<sup>[4]</sup>: White powder (43.3 mg, 88%). <sup>1</sup>H NMR (400 MHz, CDCl<sub>3</sub>, ppm): 7.93-7.90 (m, 4H), 6.82-6.80 (m, 4H), 6.22 (s, 2H), 4.35-4.30 (m, 4H), 1.37 (t, *J* = 8.4 Hz, 6H). <sup>13</sup>C NMR (100 MHz, CDCl<sub>3</sub>, ppm): 166.6, 152.0, 131.5, 121.8, 111.2, 60.5, 14.4.

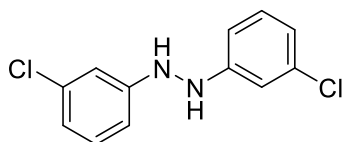

**1,2-bis(3-chlorophenyl)hydrazine (3s)**<sup>[4]</sup>: White powder (34.9 mg, 92%). <sup>1</sup>H NMR (400 MHz, CDCl<sub>3</sub>, ppm): 7.18-7.14 (m, 2H), 6.87-6.84 (m, 4H), 6.73-6.71 (m, 2H), 5.69 (s, 2H). <sup>13</sup>C NMR (100 MHz, CDCl<sub>3</sub>, ppm): 149.6, 135.3, 130.5, 120.1, 112.2, 110.4.

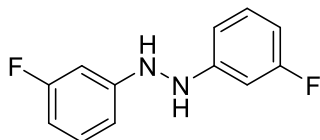

**1,2-bis(3-fluorophenyl)hydrazine (3t)**<sup>[4]</sup>: White powder (28.1 mg, 85%). <sup>1</sup>H NMR (400 MHz, CDCl<sub>3</sub>, ppm): 7.22-7.16 (m, 2H), 6.63-6.54 (m, 6H), 5.74 (s, 2H). <sup>13</sup>C NMR (100 MHz, CDCl<sub>3</sub>, ppm): 165.3, 162.8, 150.4, 150.3, 130.7, 130.6, 107.85, 107.83, 106.8, 106.6, 99.6, 99.4.

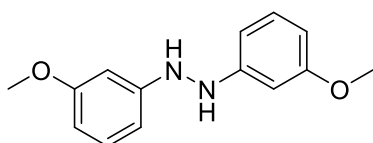

**1,2-bis(3-methoxyphenyl)hydrazine (3u)**<sup>[4]</sup>: White powder (33.3 mg, 91 %). <sup>1</sup>H NMR (400 MHz,



CDCl<sub>3</sub>, ppm): 7.17-7.13 (m, 2H) 6.48-6.41 (m, 6H), 5.63 (s, 2H), 3.78 (s, 6H). <sup>13</sup>C NMR (100 MHz, CDCl<sub>3</sub>, ppm): 160.9, 150.4, 130.2, 105.1, 105.0, 98.3, 55.1.

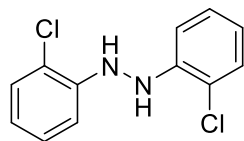

**1,2-bis(2-chlorophenyl)hydrazine(3v)**<sup>[3]</sup>: White powder (36.1 mg, 95%). <sup>1</sup>H NMR (400 MHz, CDCl<sub>3</sub>, ppm): 7.34-7.28 (m, 2H), 7.17-7.14 (m, 2H), 6.99-6.97 (m, 2H), 6.83-6.80 (m, 2H), 6.24 (s, 2H). <sup>13</sup>C NMR (100 MHz, CDCl<sub>3</sub>, ppm): 143.8, 129.4, 128.0, 120.2, 117.9, 112.9.

## References

- (1) P.-P. Xu, J.-Y. Liao, J.-J. Zhang, W.-M. Shi, C. Liang, G.-F. Su and D.-L. Mo, *Org. Lett.*, 2021, **23**, 7482–7486.
- (2) T. Hu, M. Jaber, G. Tran, D. Bouyssi, N. Monteiro and A. Amgoune, *Chemistry A European J*, 2023, **29**, e202301636.
- (3) M. K. Sahoo, G. Sivakumar, S. Jadhav, S. Shaikh and E. Balaraman, *Org. Biomol. Chem.*, 2021, **19**, 5289–5293.
- (4) D. Gong, D. Kong, Y. Li, C. Gao and L. Zhao, *Org. Lett.*, 2023, **25**, 4198–4202.
- (5) L. Wang, A. Ishida, Y. Hashidoko and M. Hashimoto, *Angew. Chem. Int. Ed.*, 2017, **129**, 888-891.

### 3. NMR Spectra

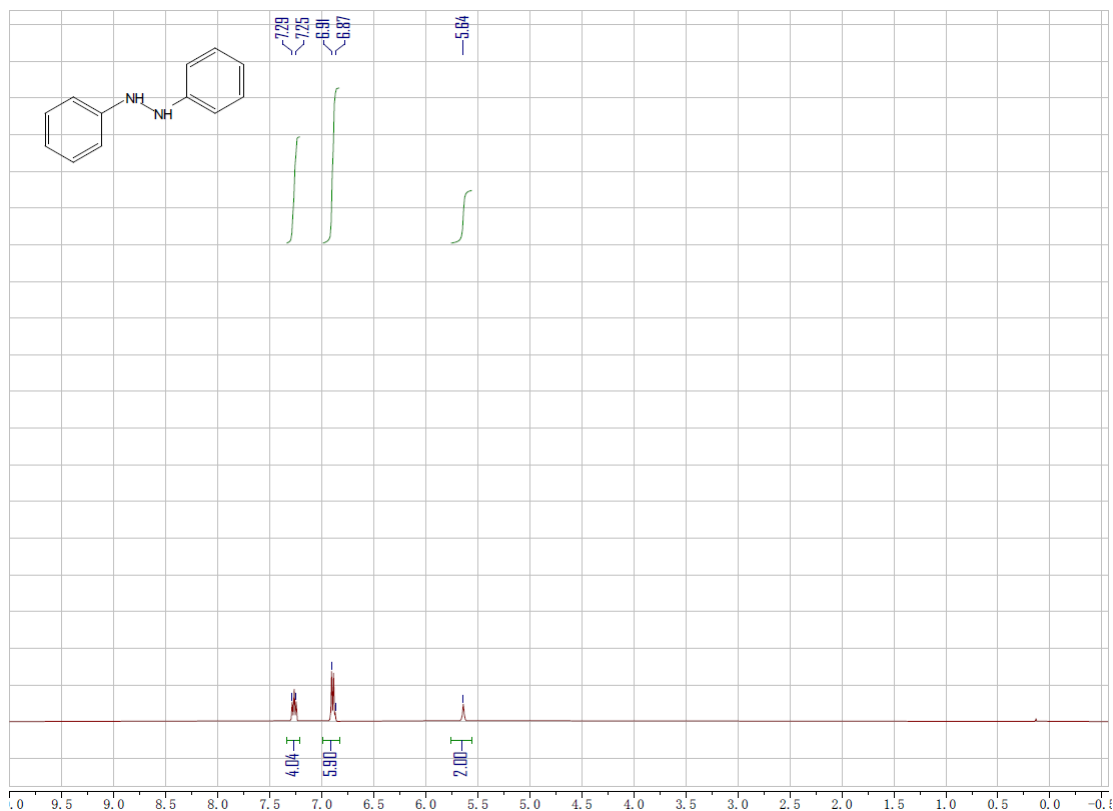

Figure S2. <sup>1</sup>H NMR Spectrum of **3a**

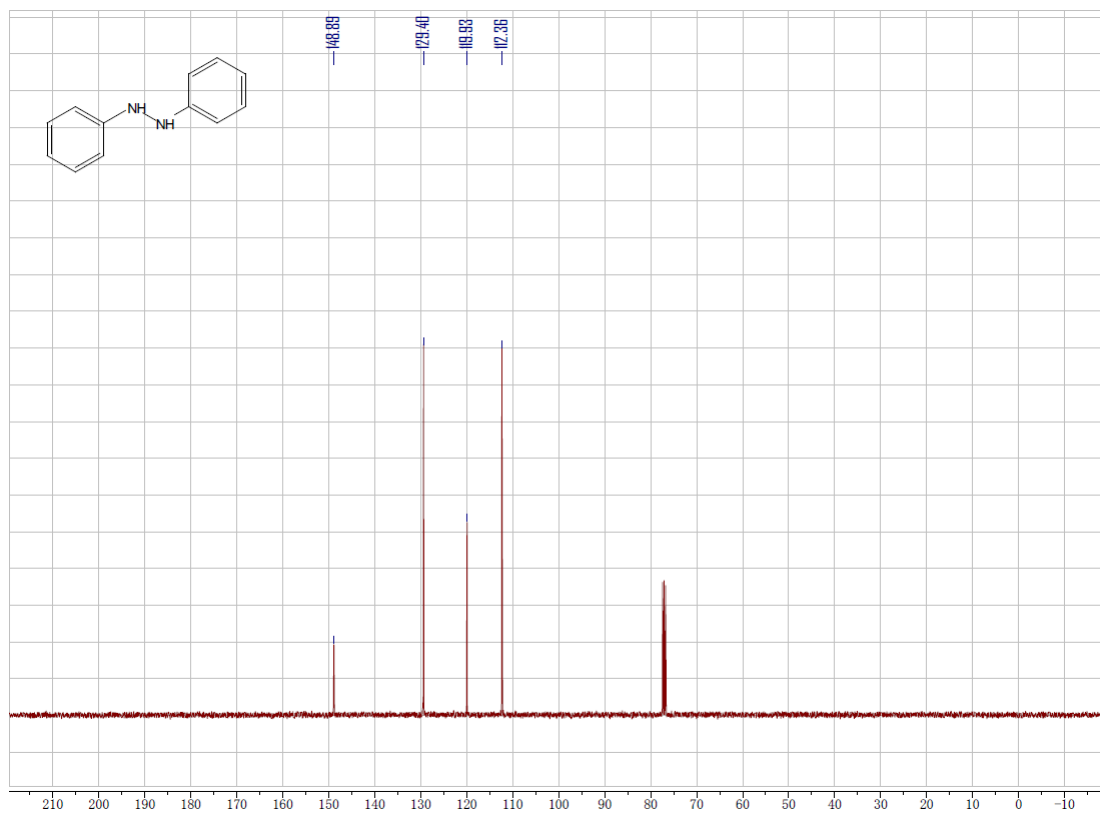

Figure S3. <sup>13</sup>C NMR Spectrum of **3a**

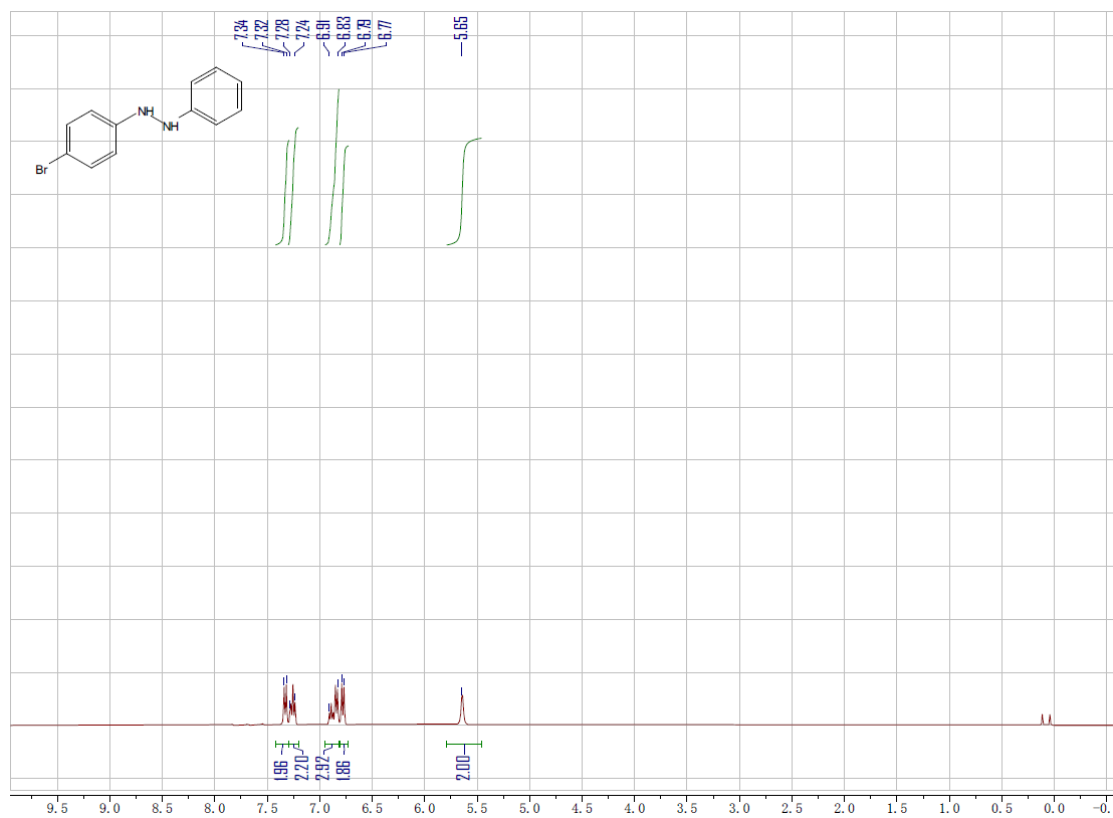

Figure S4. <sup>1</sup>H NMR Spectrum of **3b**

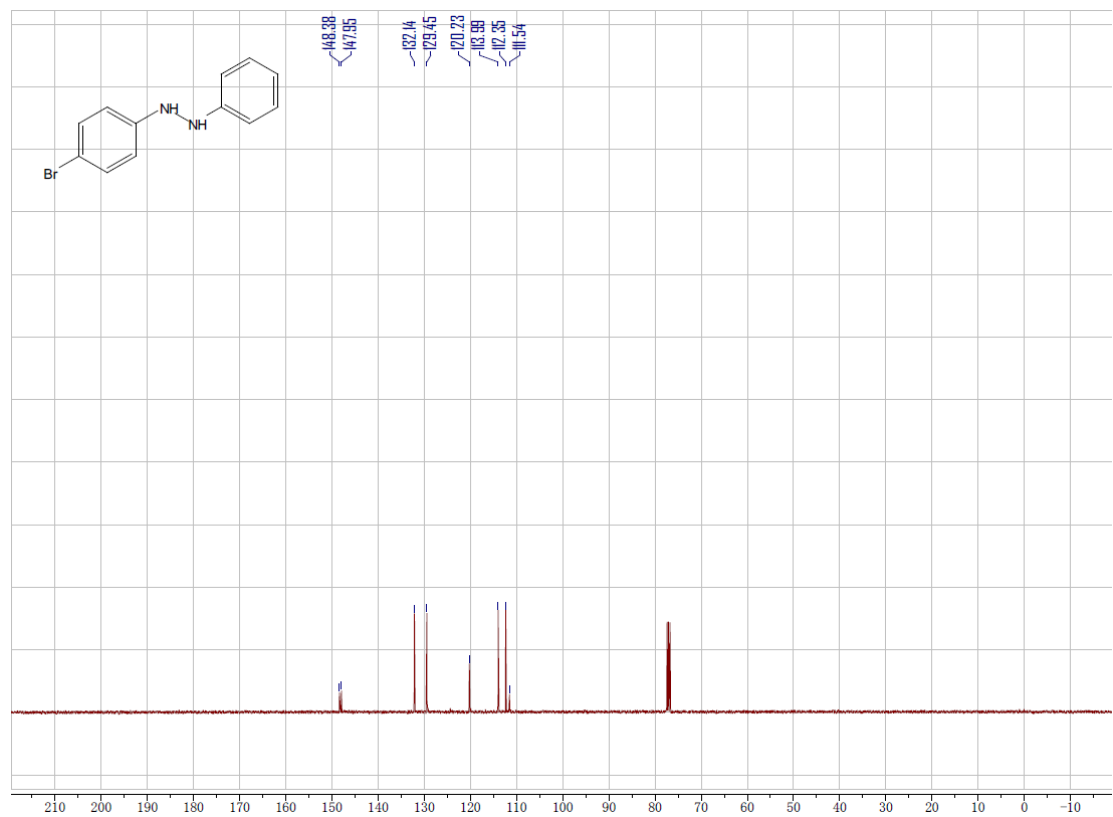

Figure S5. <sup>13</sup>C NMR Spectrum of **3b**

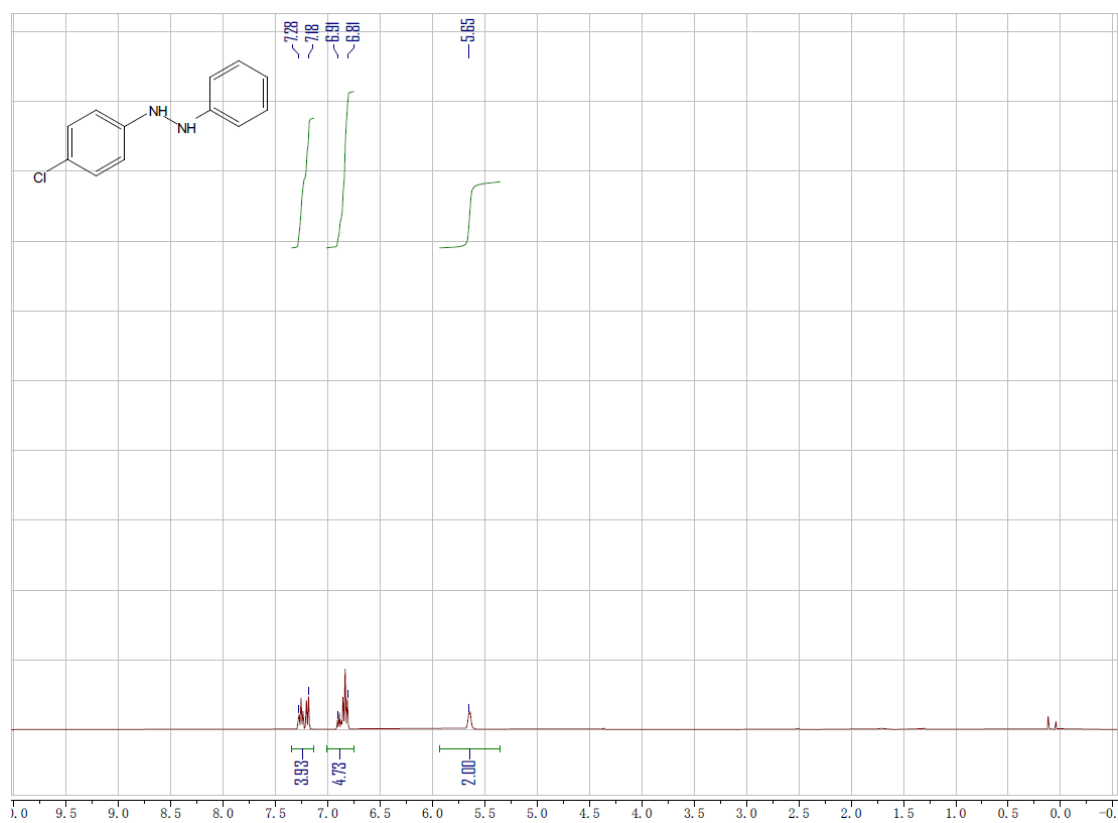

Figure S6. <sup>1</sup>H NMR Spectrum of 3c

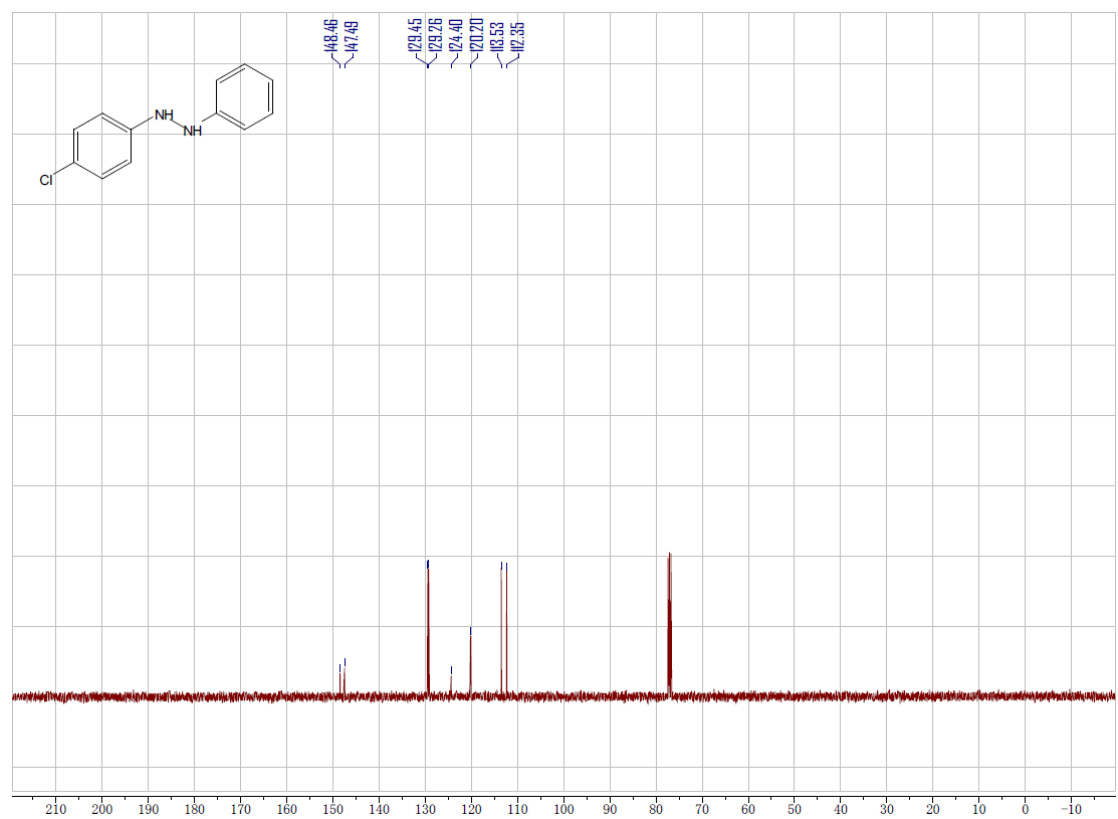

Figure S7. <sup>13</sup>C NMR Spectrum of 3c

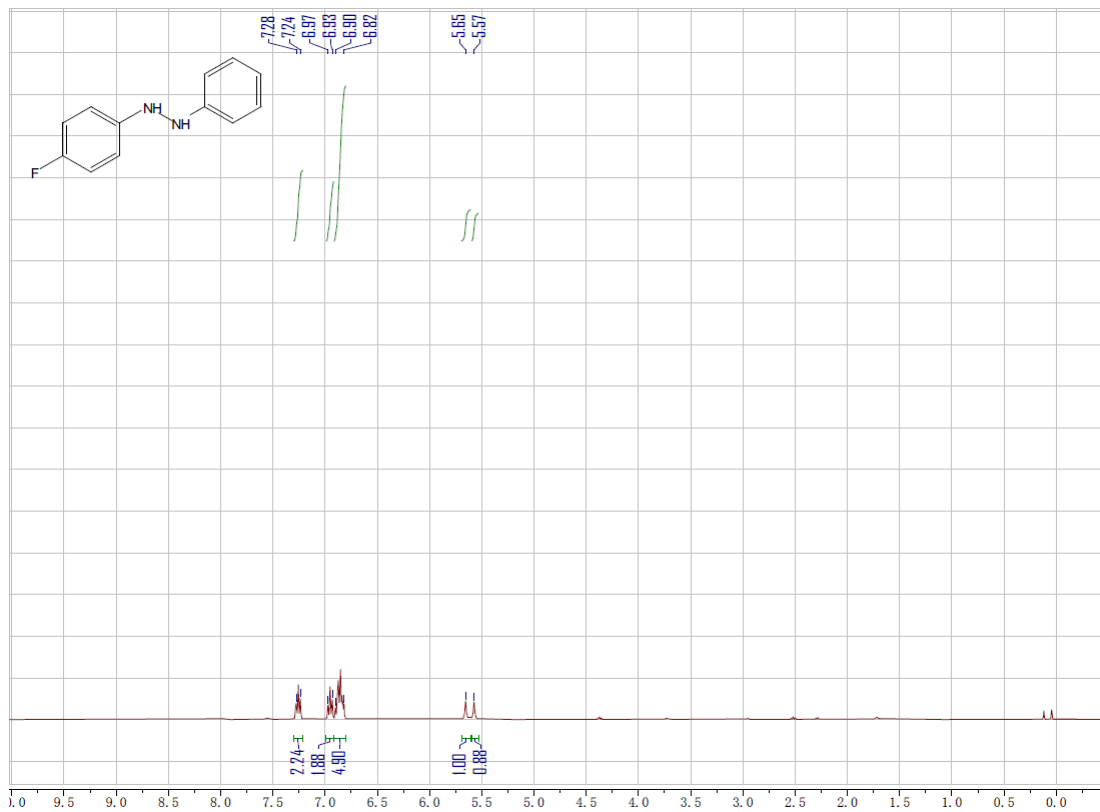

Figure S8. <sup>1</sup>H NMR Spectrum of **3d**

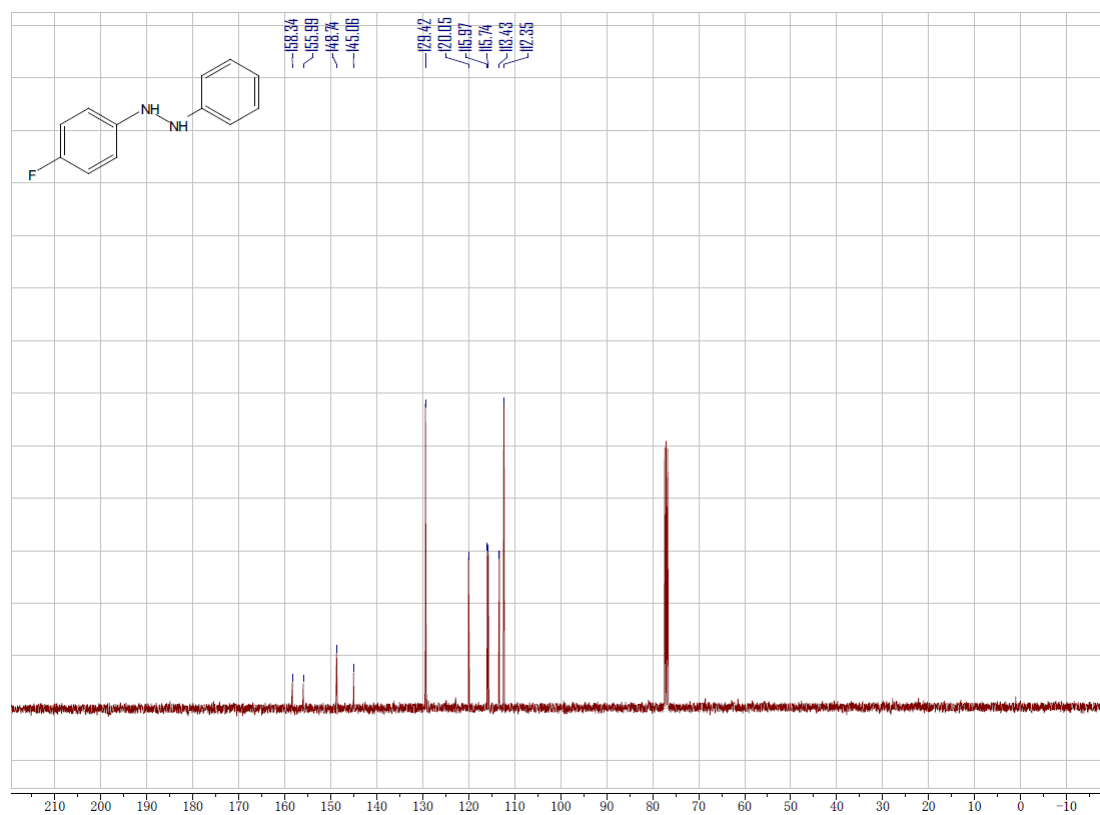

Figure S9. <sup>13</sup>C NMR Spectrum of **3d**

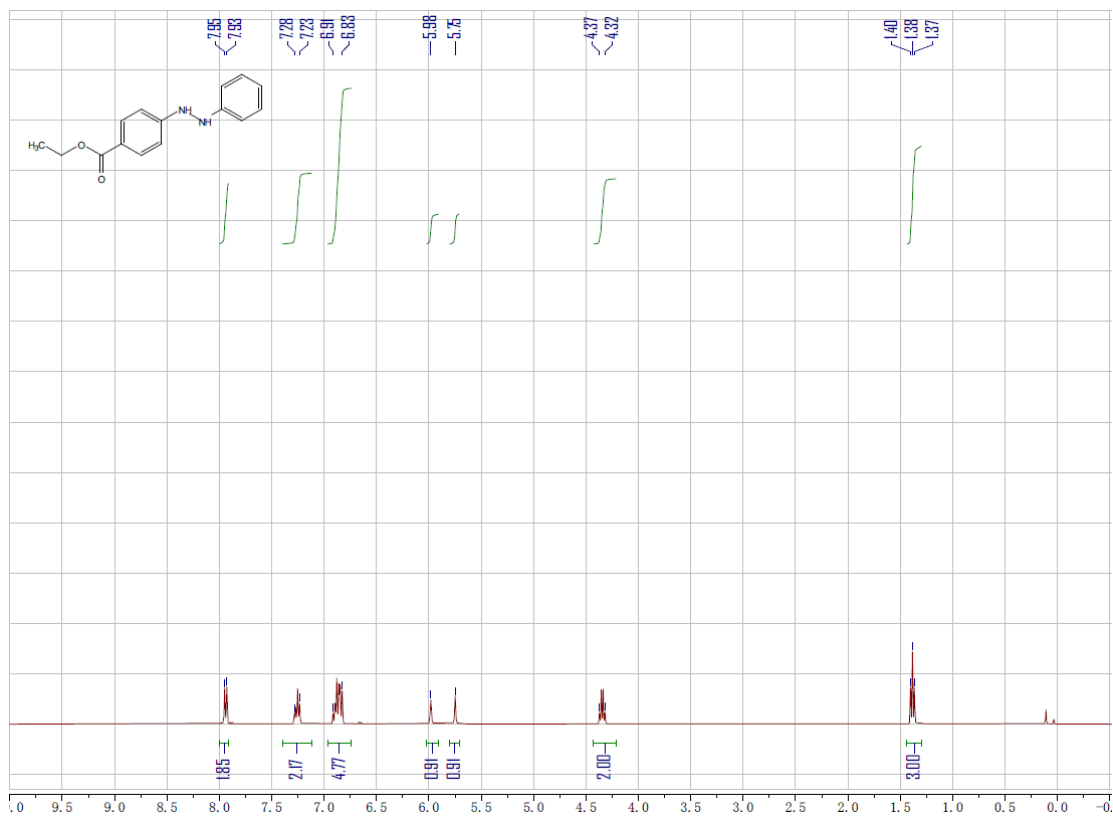

Figure S10. <sup>1</sup>H NMR Spectrum of **3e**

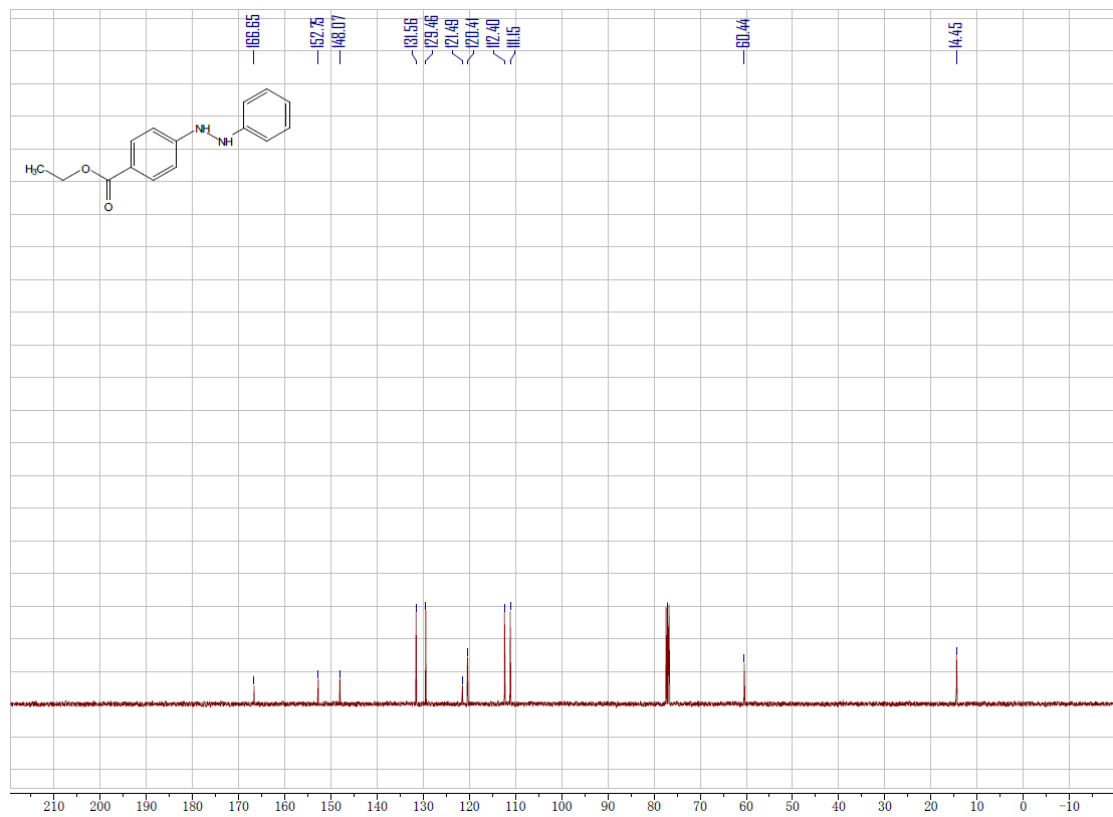

Figure S11. <sup>13</sup>C NMR Spectrum of **3e**

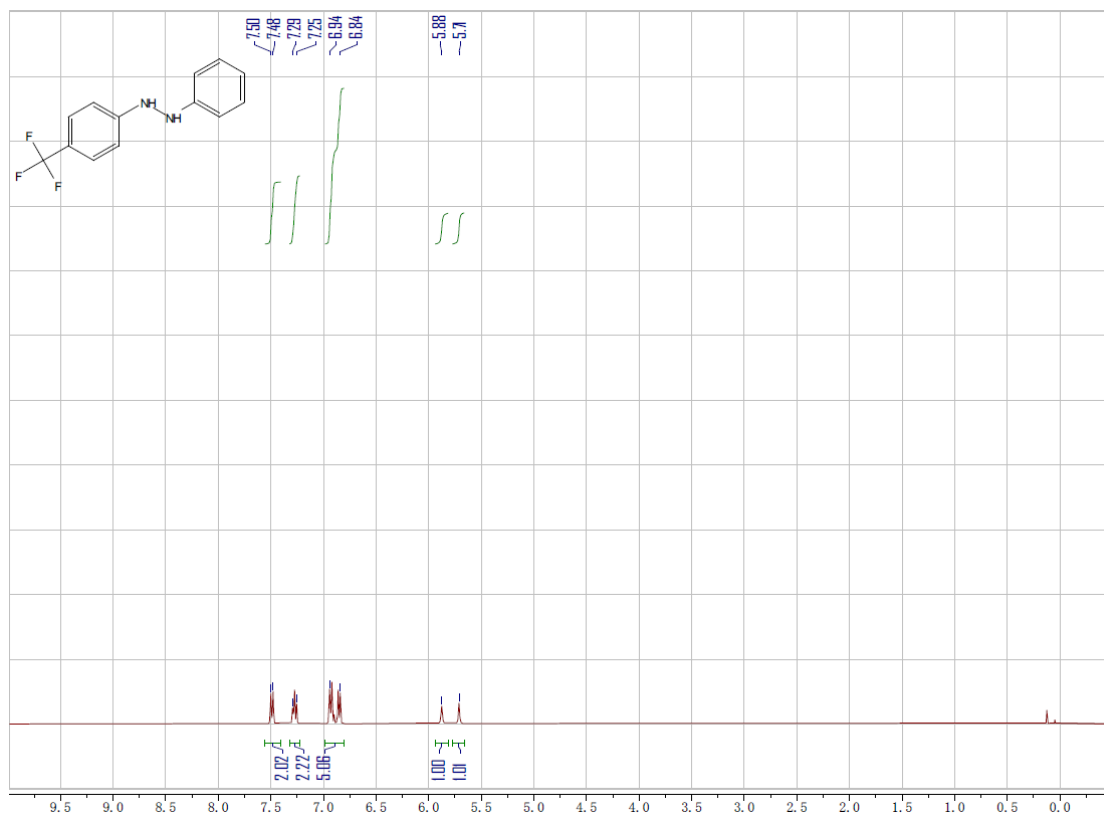

Figure S12.  $^1\text{H}$  NMR Spectrum of **3f**

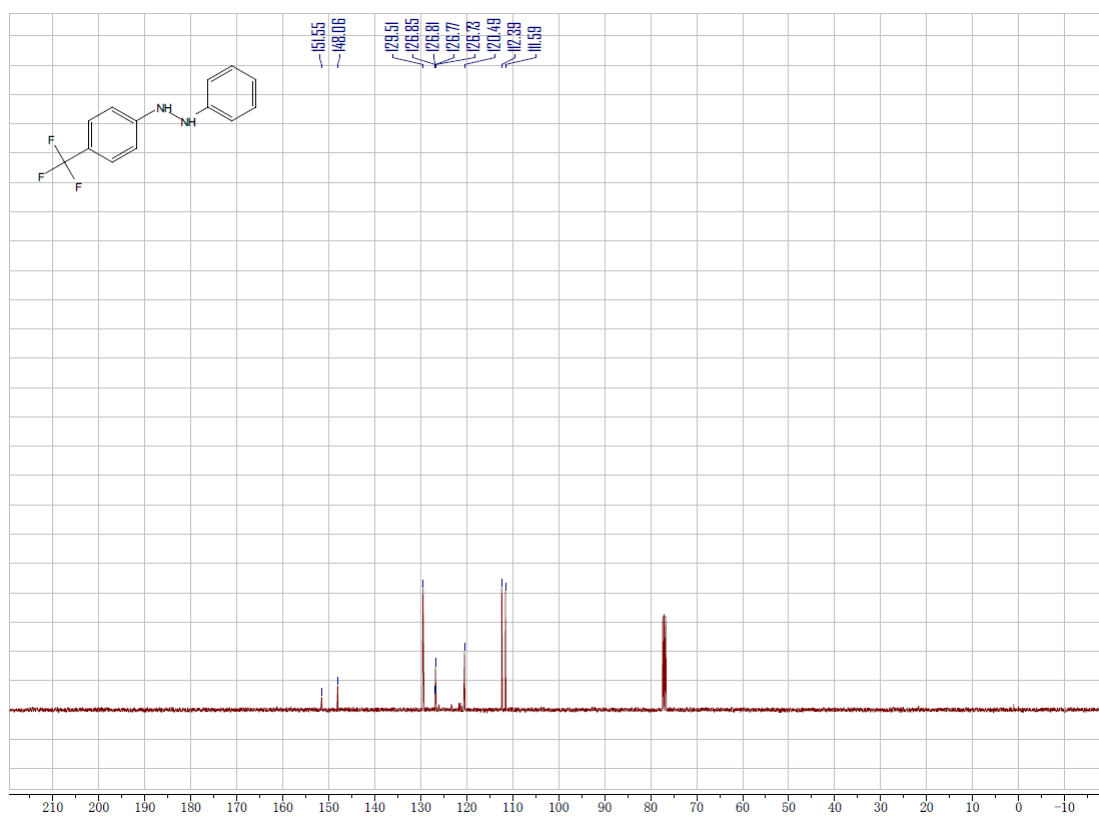

Figure S13.  $^{13}\text{C}$  NMR Spectrum of **3f**

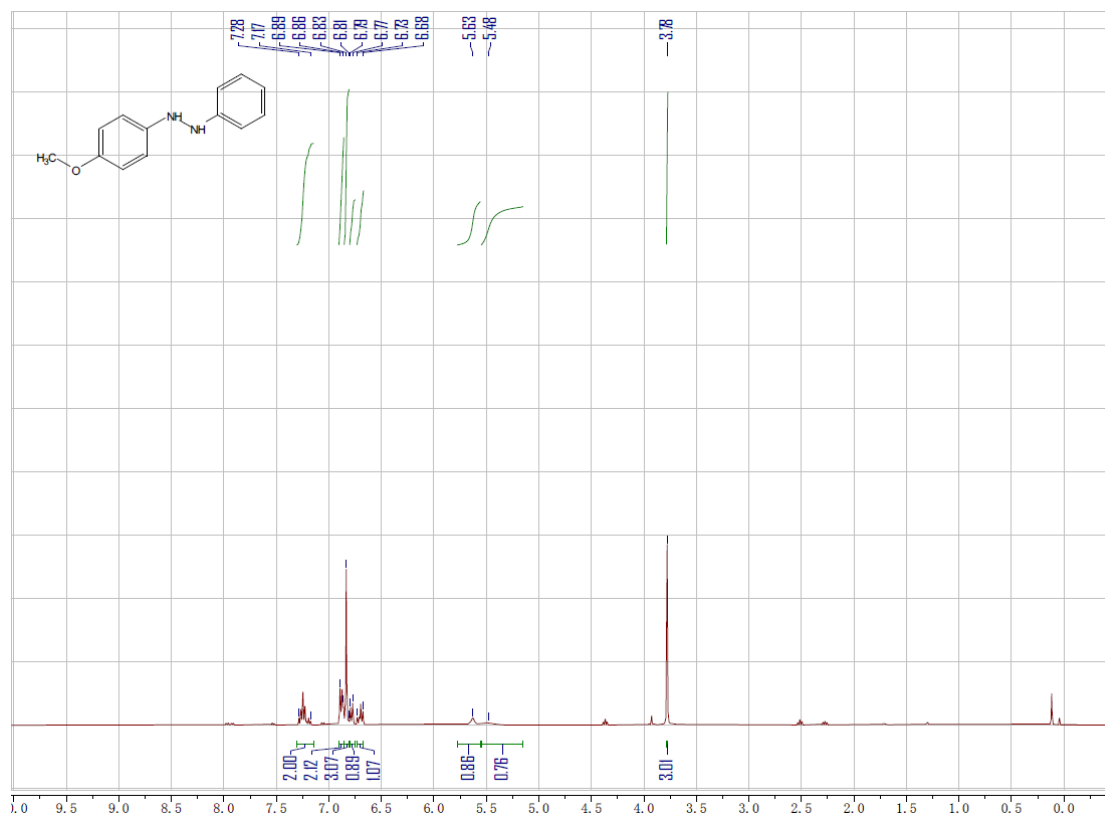

Figure S14. <sup>1</sup>H NMR Spectrum of **3g**

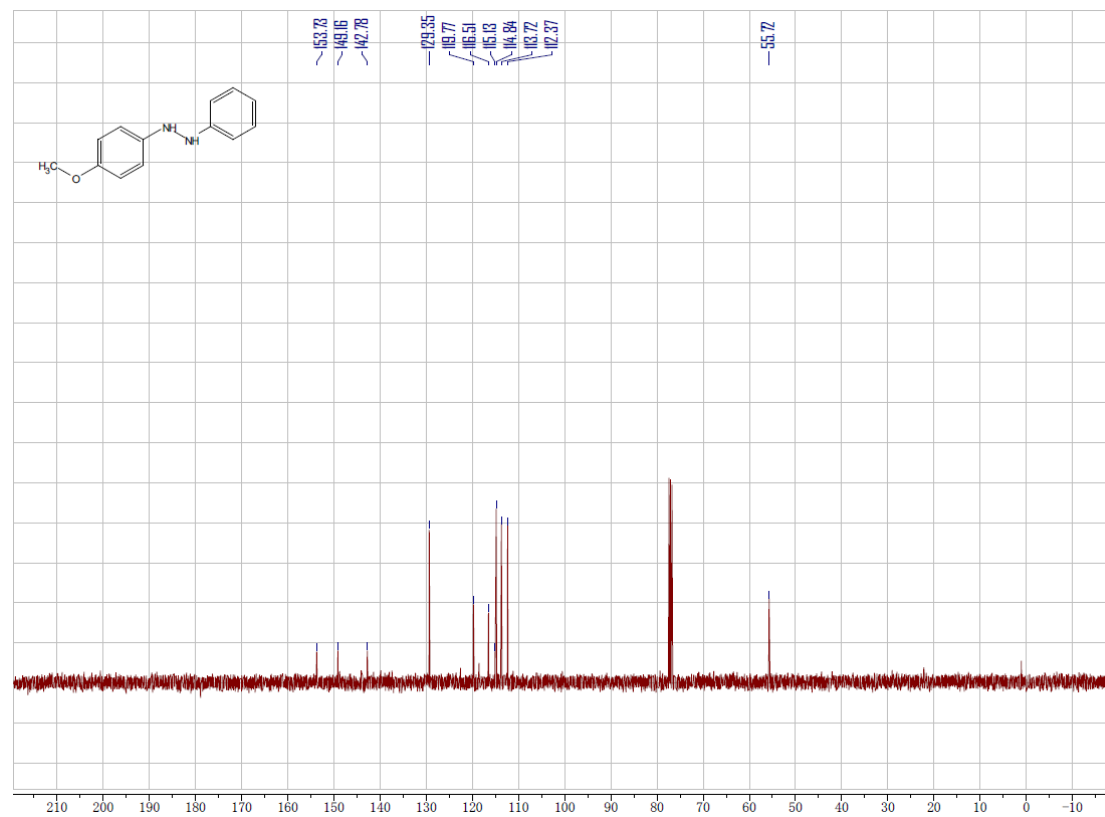

Figure S15. <sup>13</sup>C NMR Spectrum of **3g**



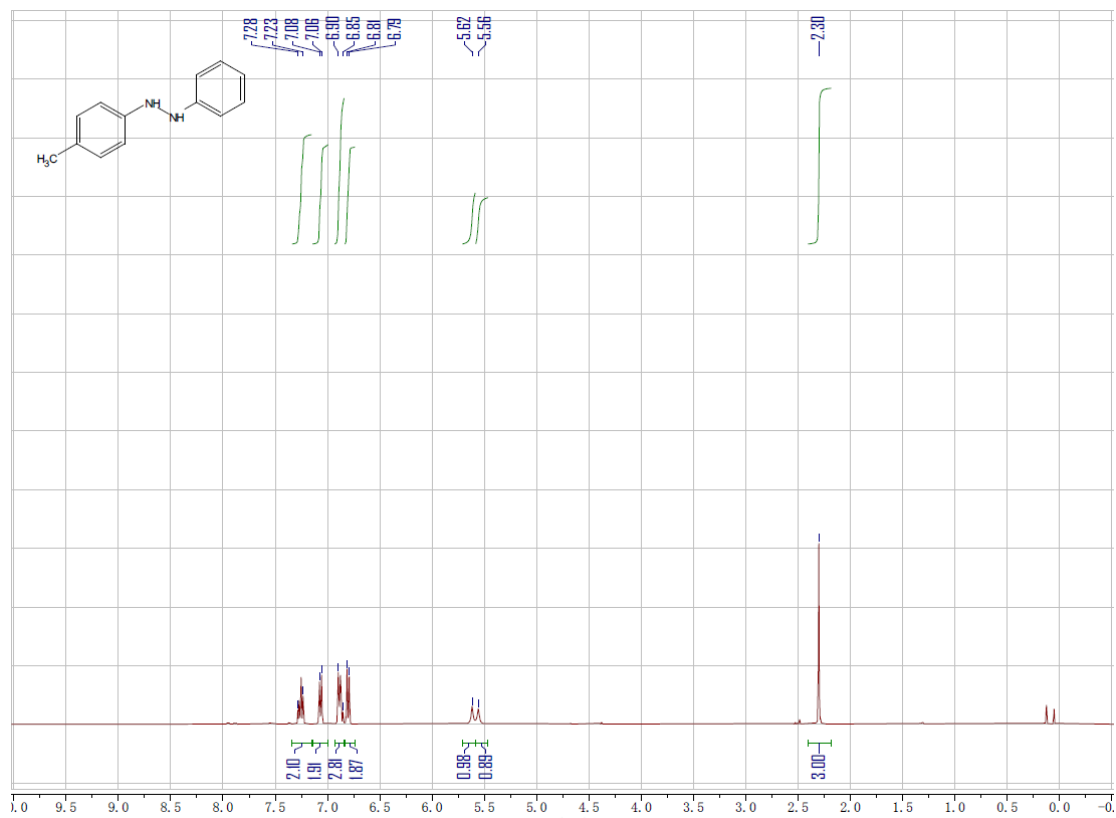

Figure S16.  $^1\text{H}$  NMR Spectrum of **3h**

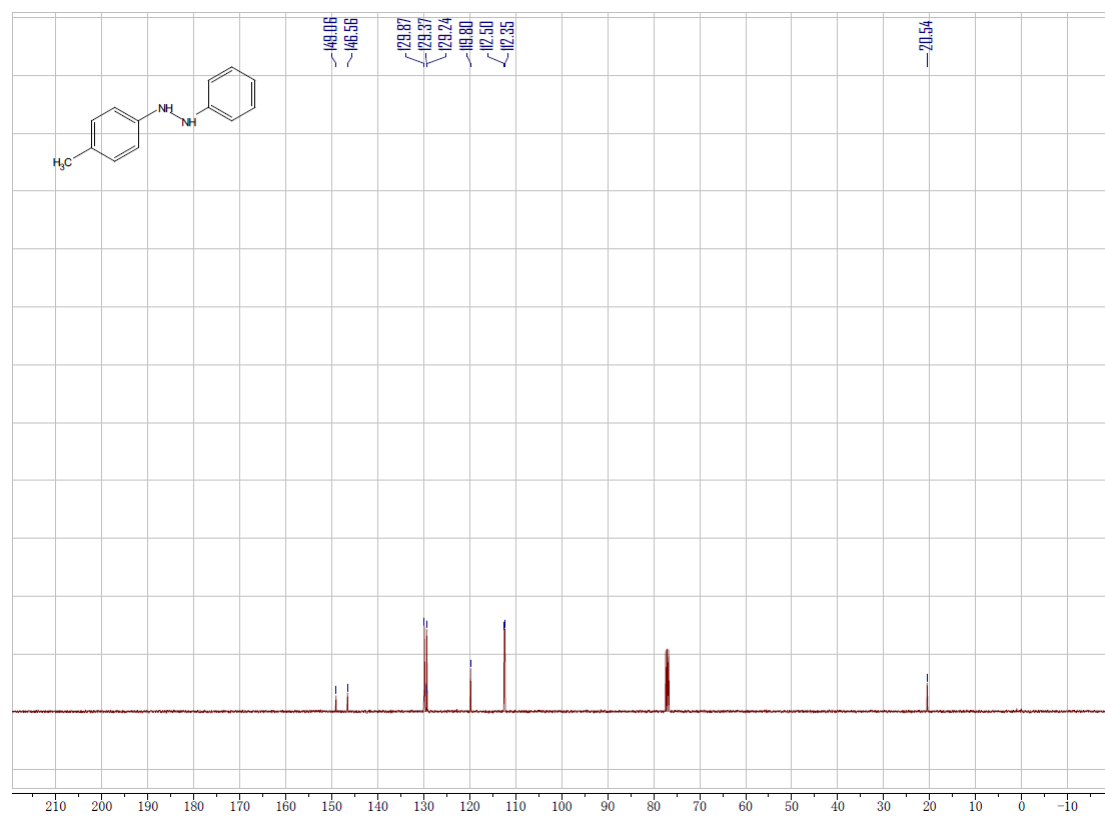

Figure S17.  $^{13}\text{C}$  NMR Spectrum of **3h**

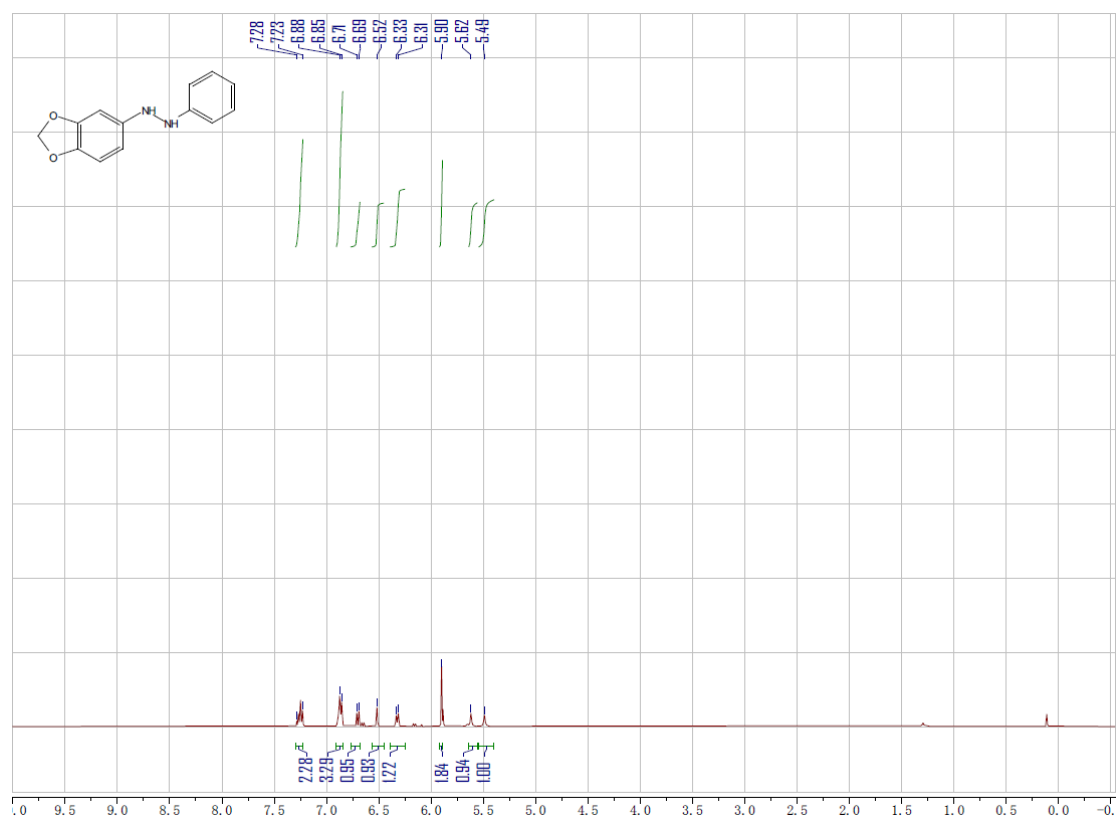

Figure S18.  $^1\text{H}$  NMR Spectrum of **3i**

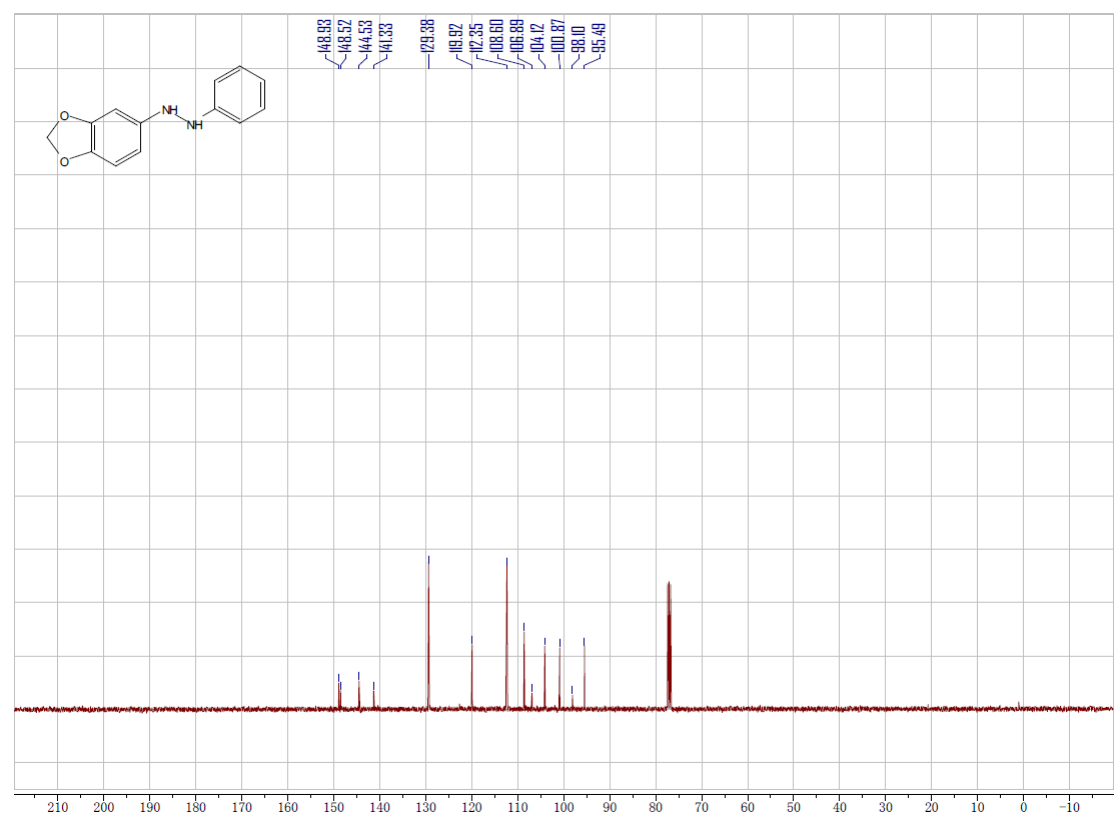

Figure S19.  $^{13}\text{C}$  NMR Spectrum of **3i**

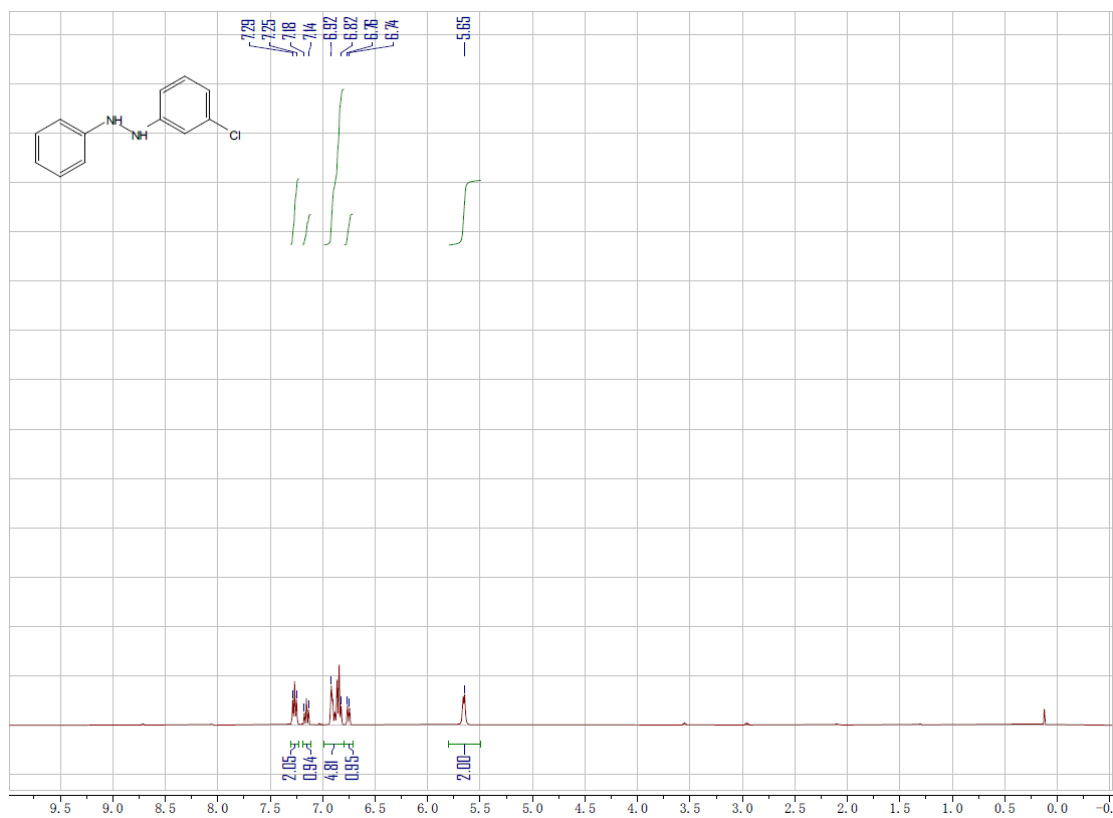

Figure S20. <sup>1</sup>H NMR Spectrum of **3j**

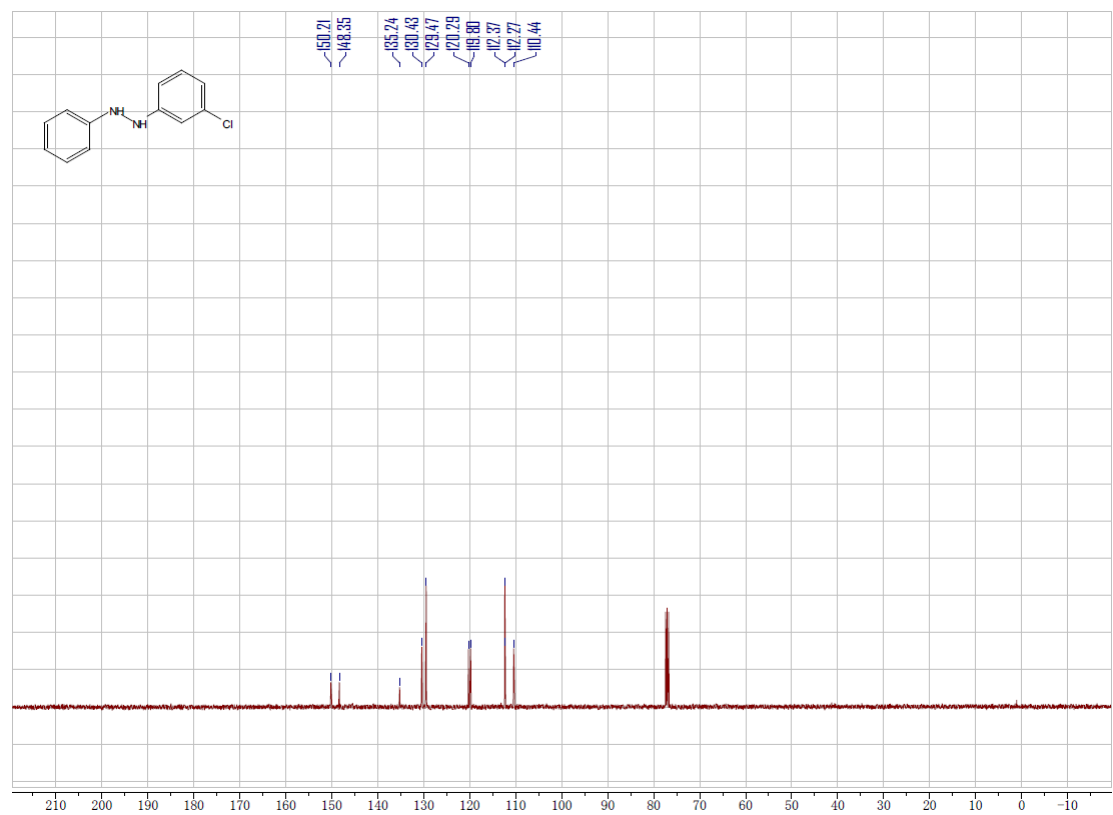

Figure S21. <sup>13</sup>C NMR Spectrum of **3j**

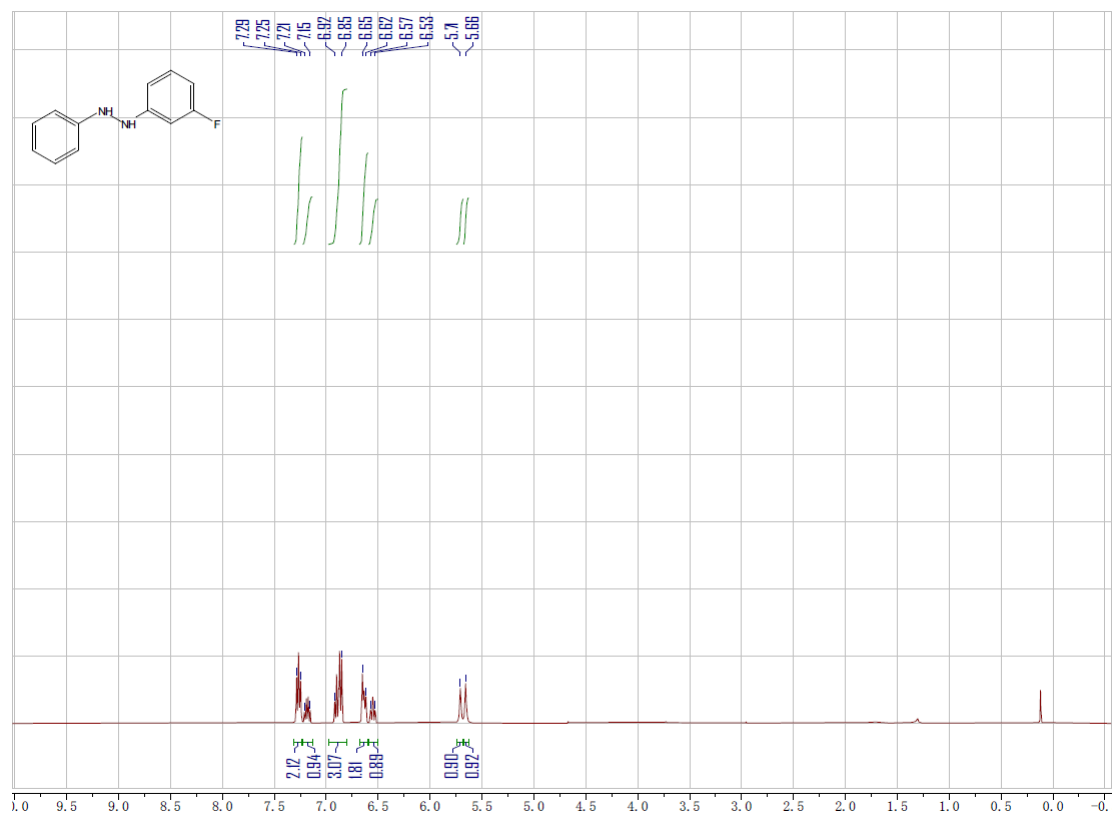

Figure S22. <sup>1</sup>H NMR Spectrum of **3k**

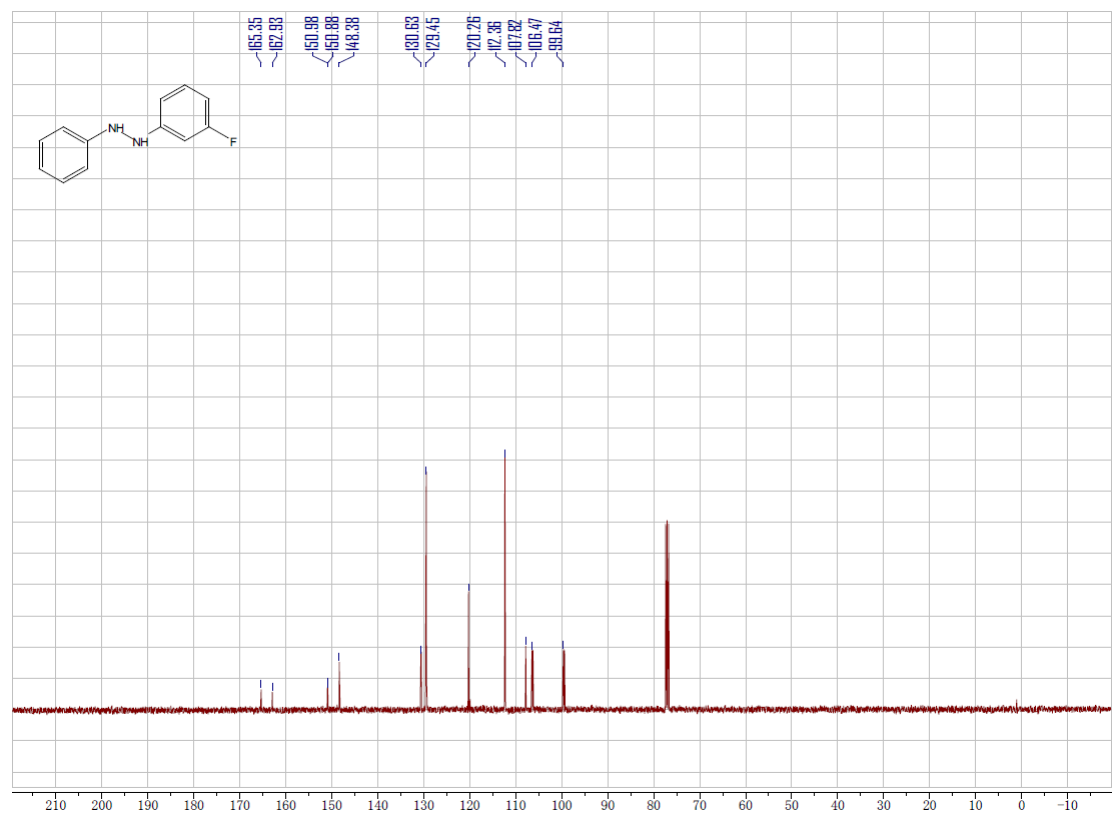

Figure S23. <sup>13</sup>C NMR Spectrum of **3k**

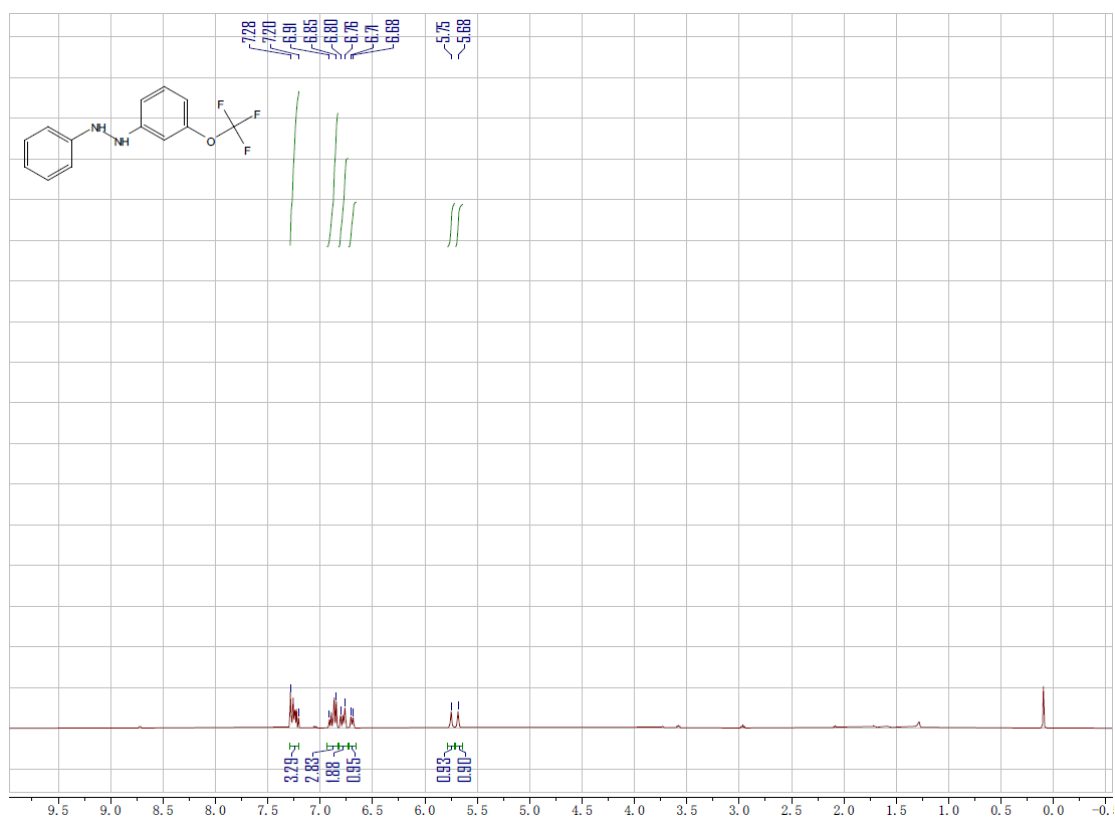

Figure S24. <sup>1</sup>H NMR Spectrum of **31**

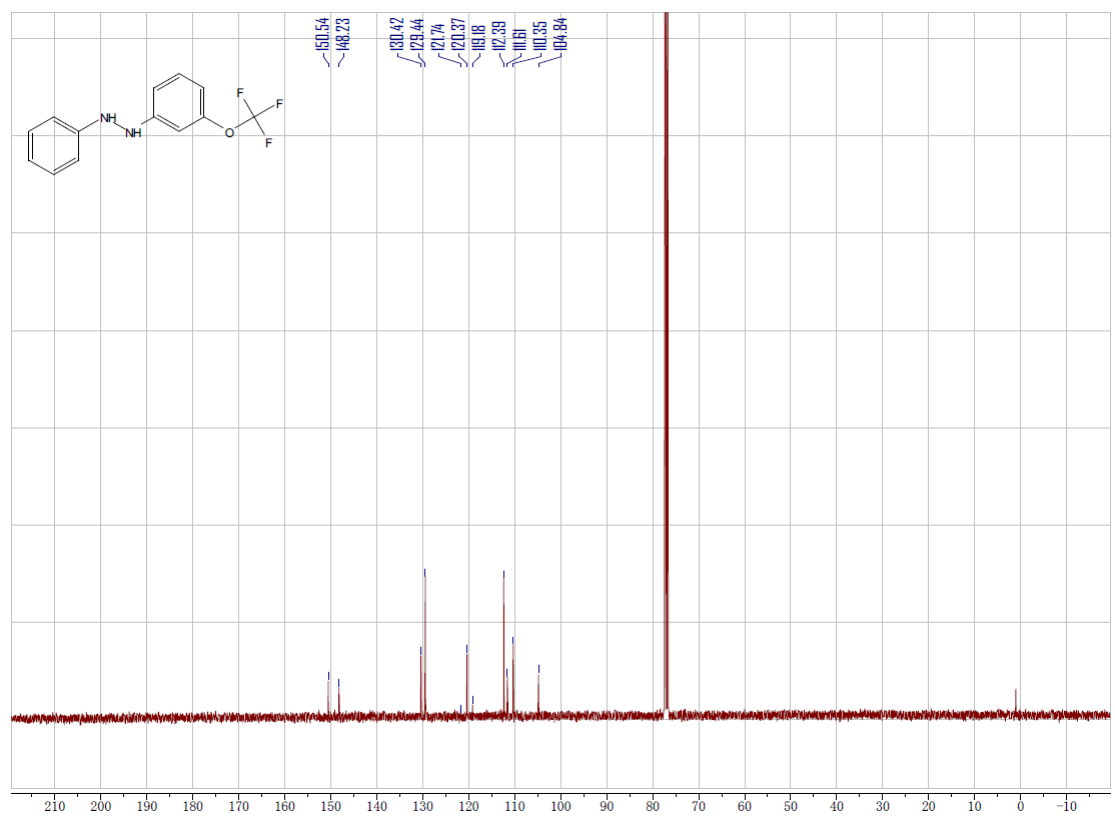

Figure S25. <sup>13</sup>C NMR Spectrum of **31**

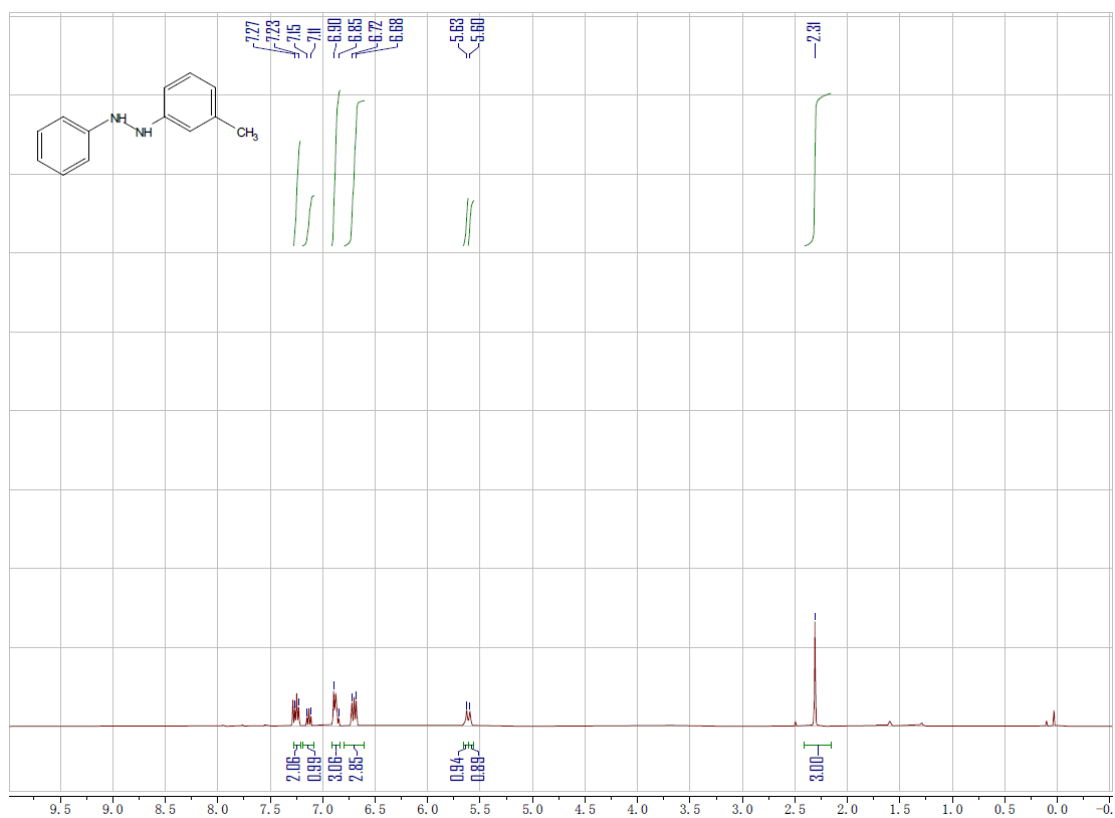

Figure S26.  $^1\text{H}$  NMR Spectrum of **3m**

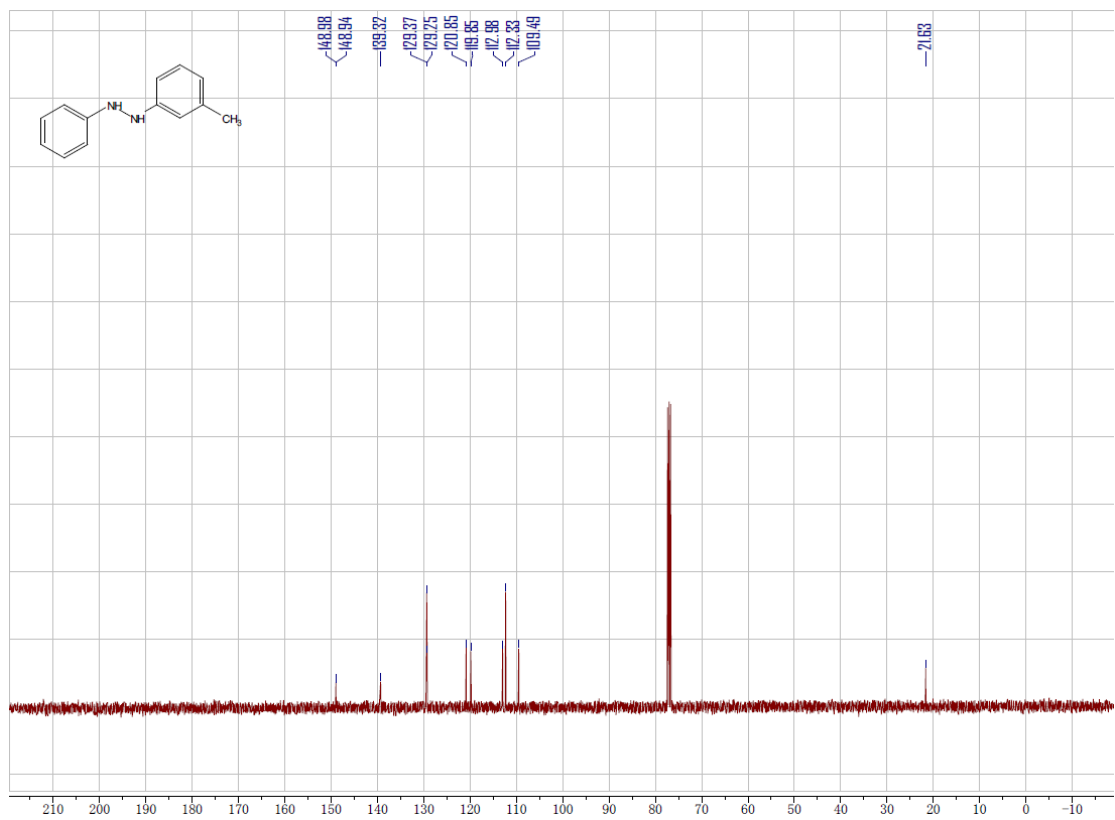

Figure S27.  $^{13}\text{C}$  NMR Spectrum of **3m**

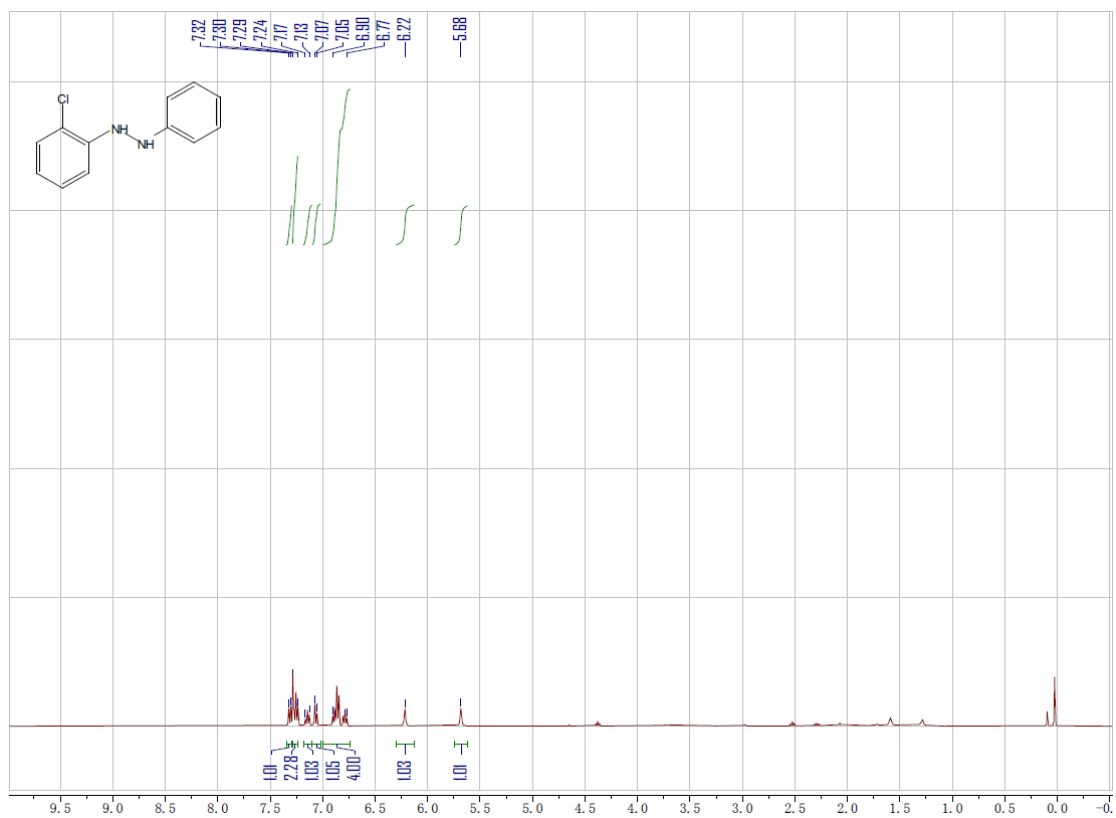

Figure S28.  $^1\text{H}$  NMR Spectrum of **3n**

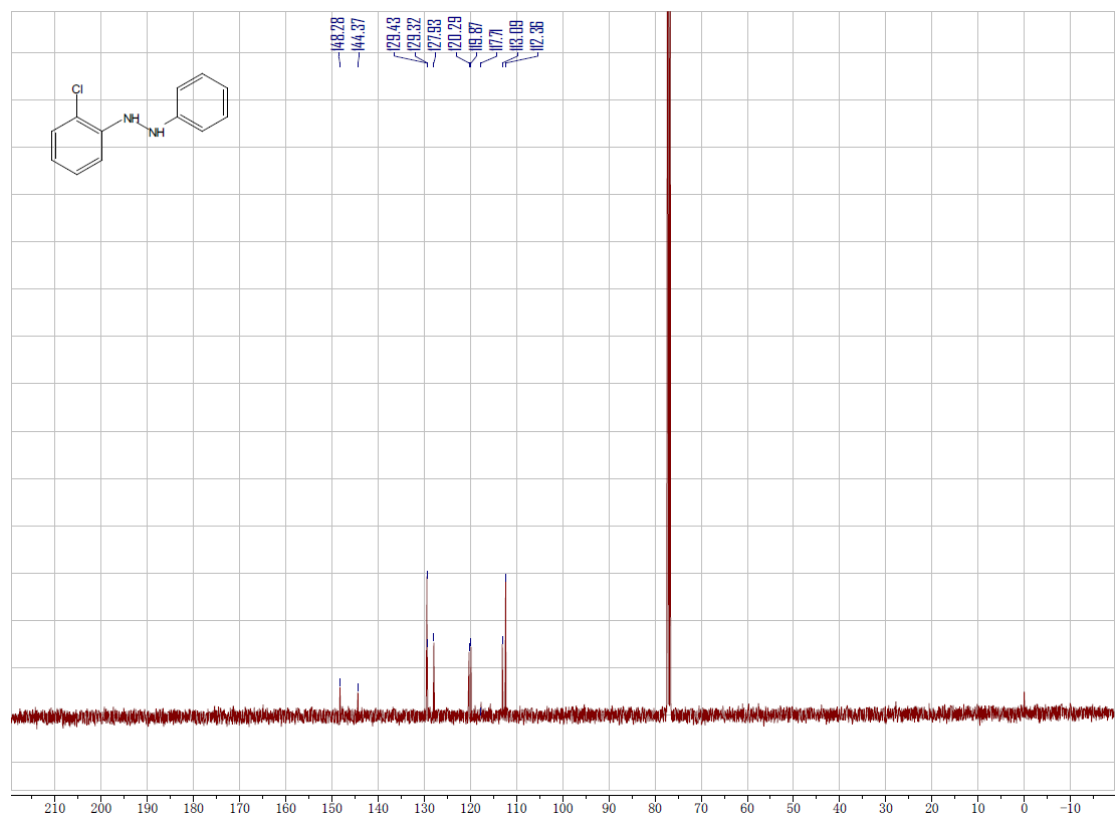

Figure S29.  $^{13}\text{C}$  NMR Spectrum of **3n**

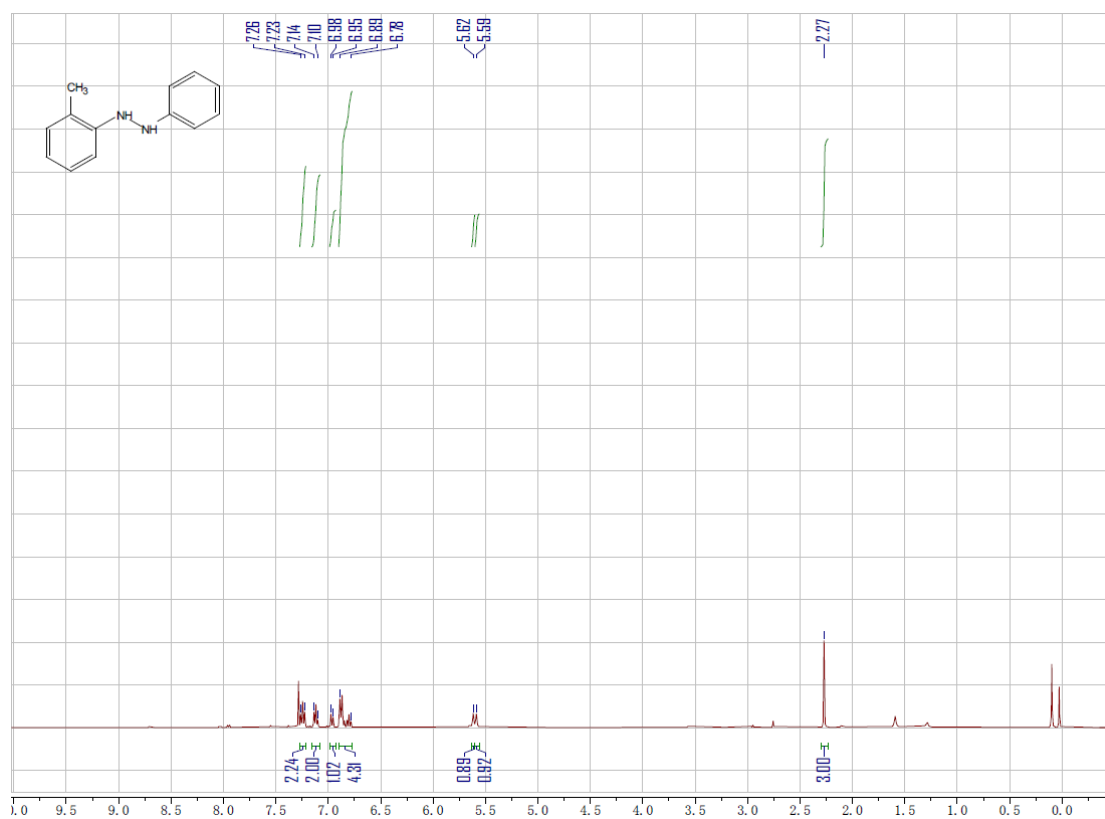

Figure S30.  $^1\text{H}$  NMR Spectrum of **3o**

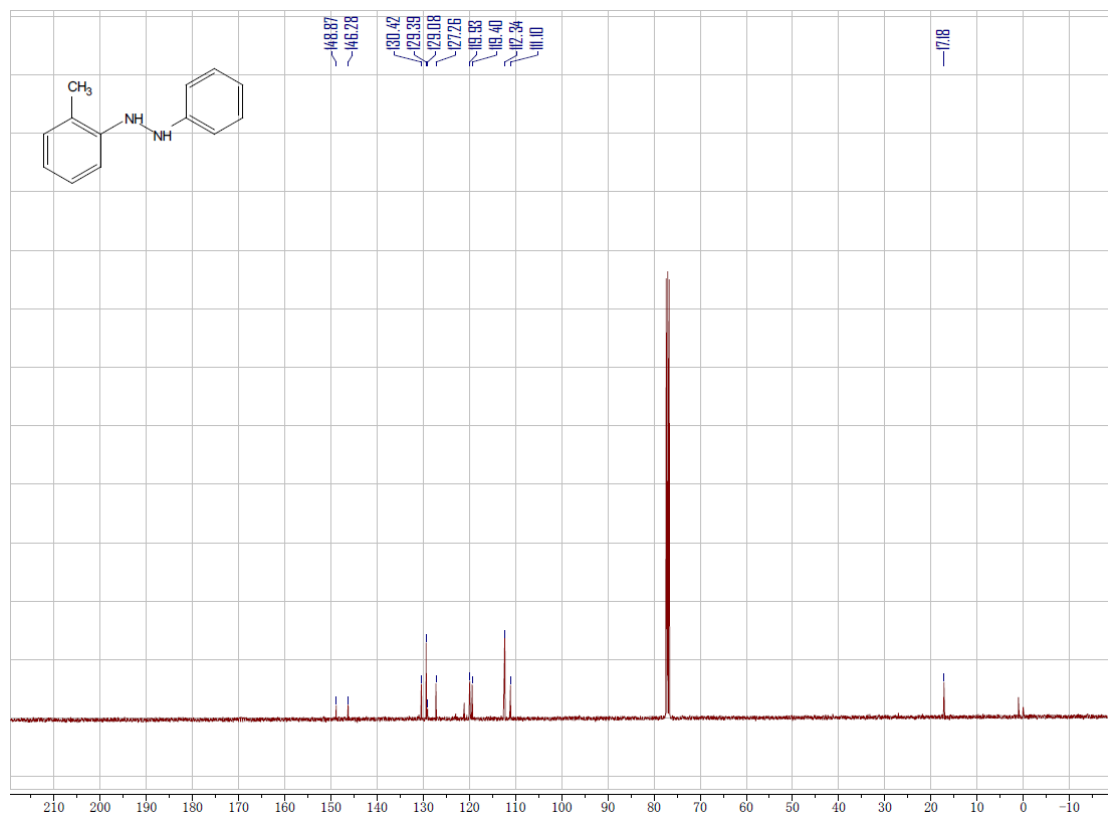

Figure S31.  $^{13}\text{C}$  NMR Spectrum of **3o**



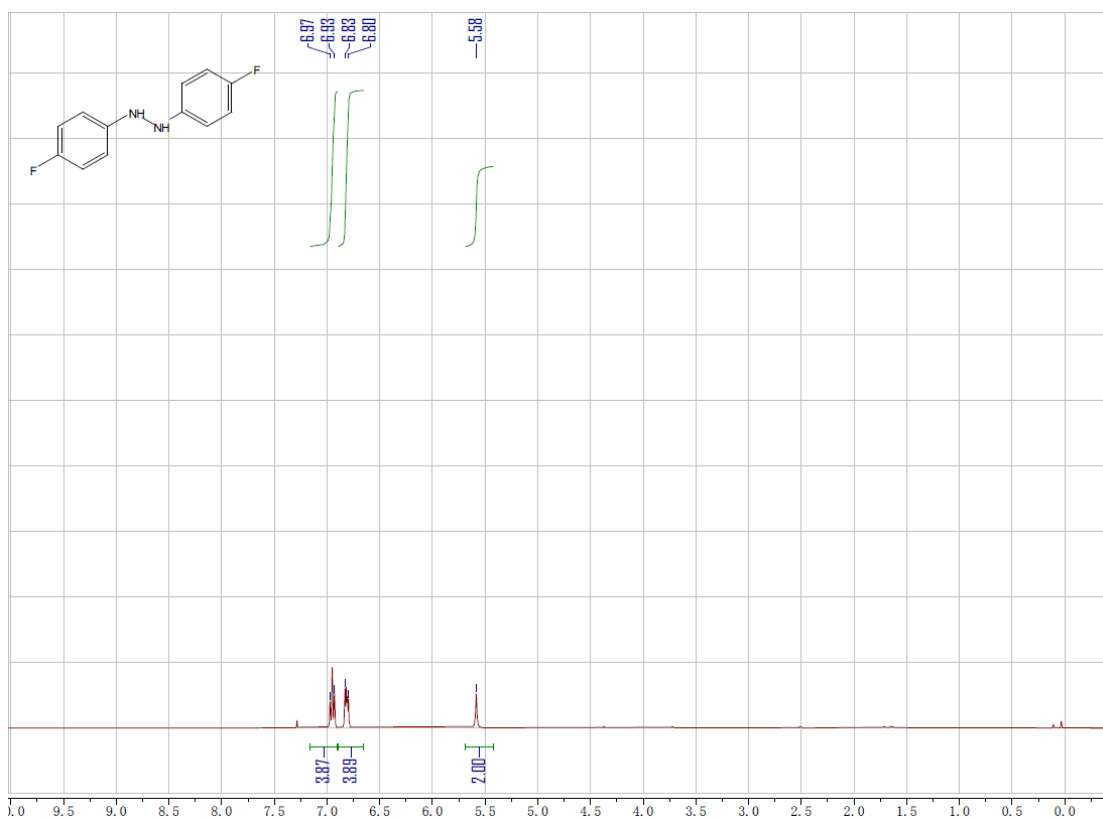

Figure S32.  $^1\text{H}$  NMR Spectrum of **3p**

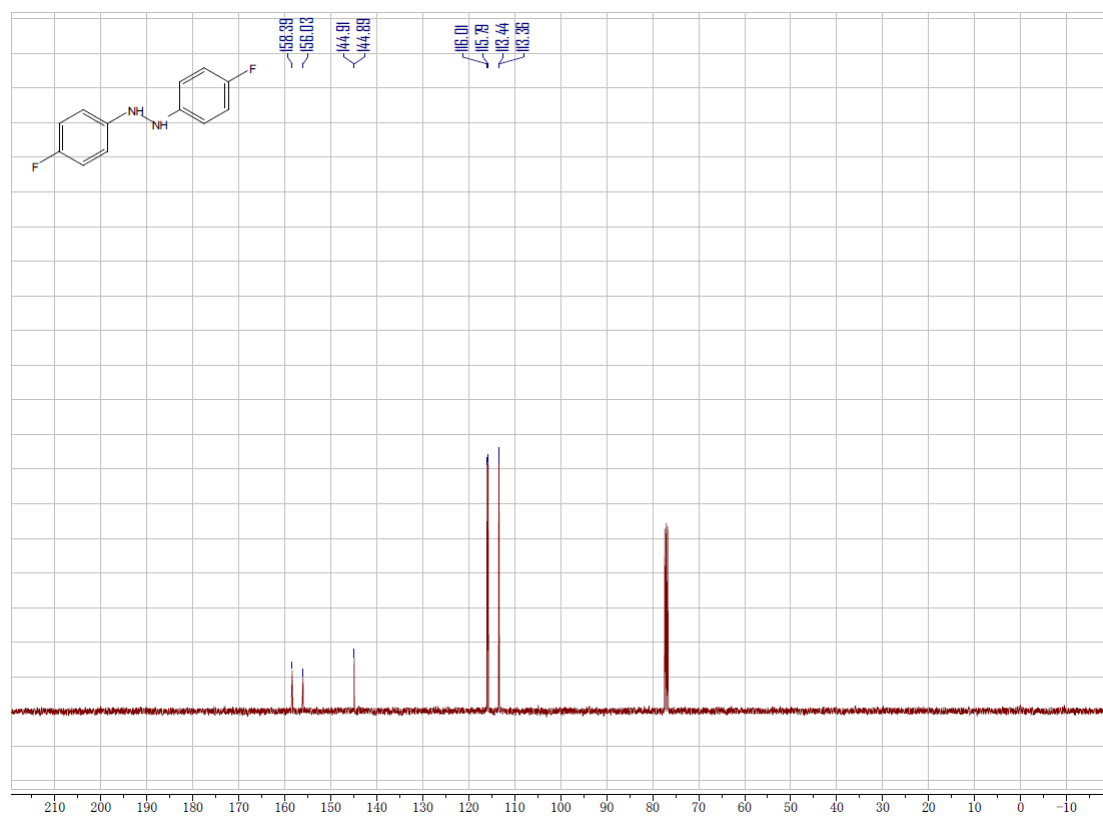

Figure S33.  $^{13}\text{C}$  NMR Spectrum of **3p**

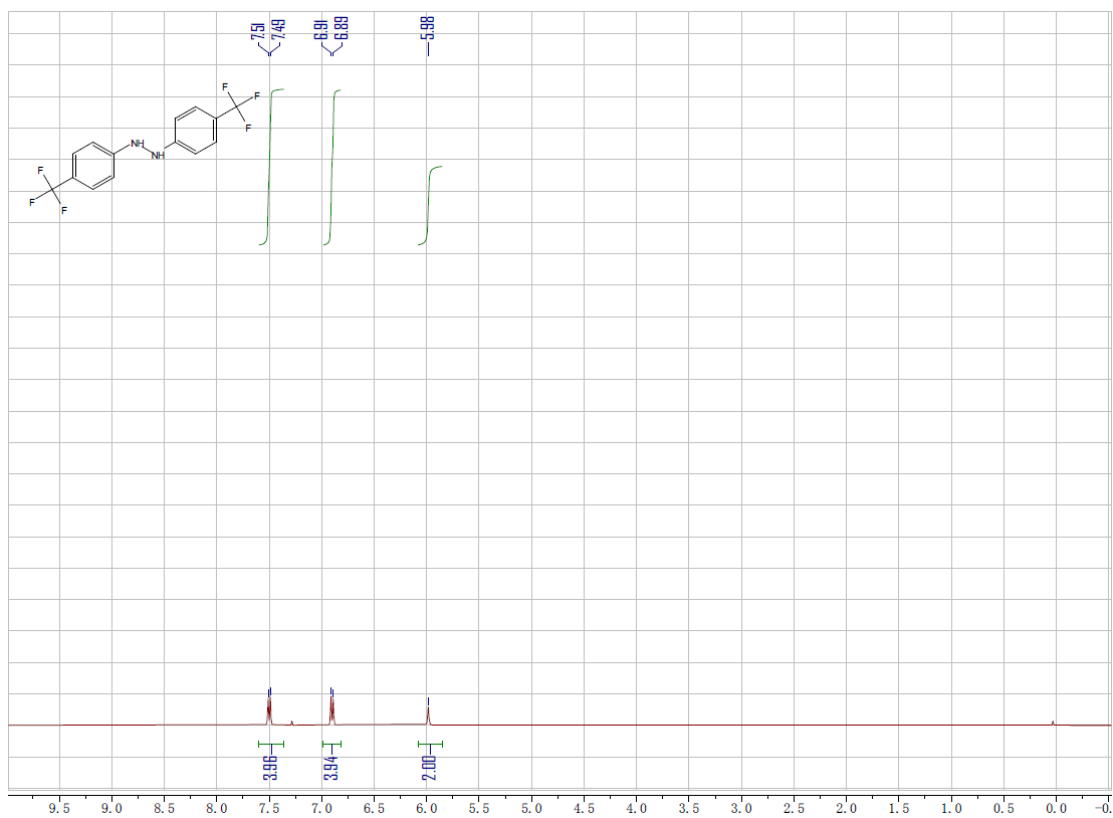

Figure S34.  $^1\text{H}$  NMR Spectrum of **3q**

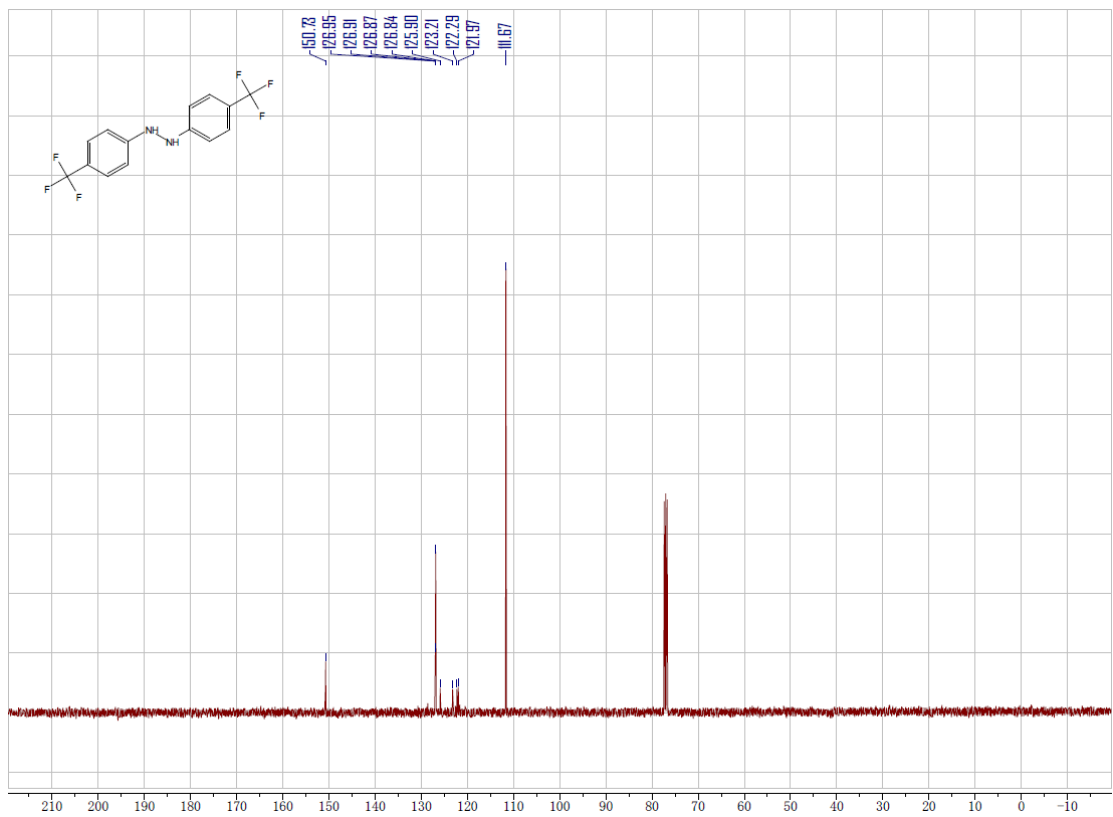

Figure S35.  $^{13}\text{C}$  NMR Spectrum of **3q**

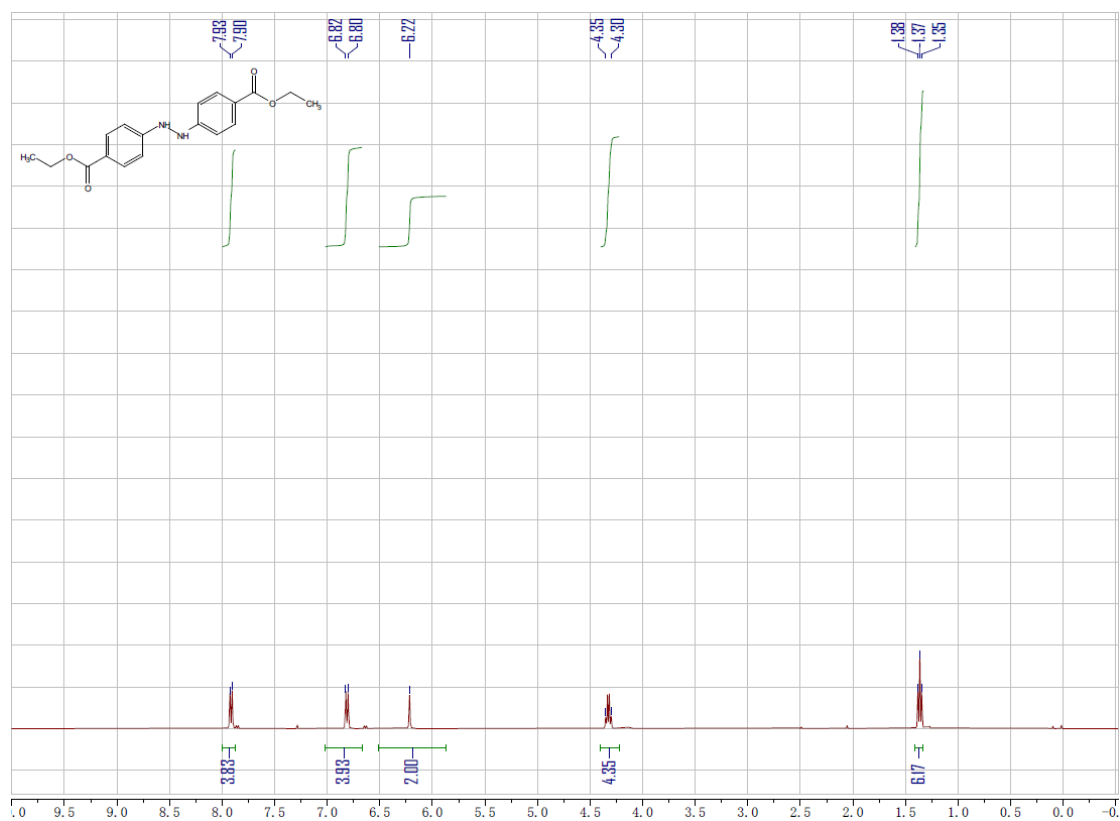

Figure S36.  $^1\text{H}$  NMR Spectrum of **3r**

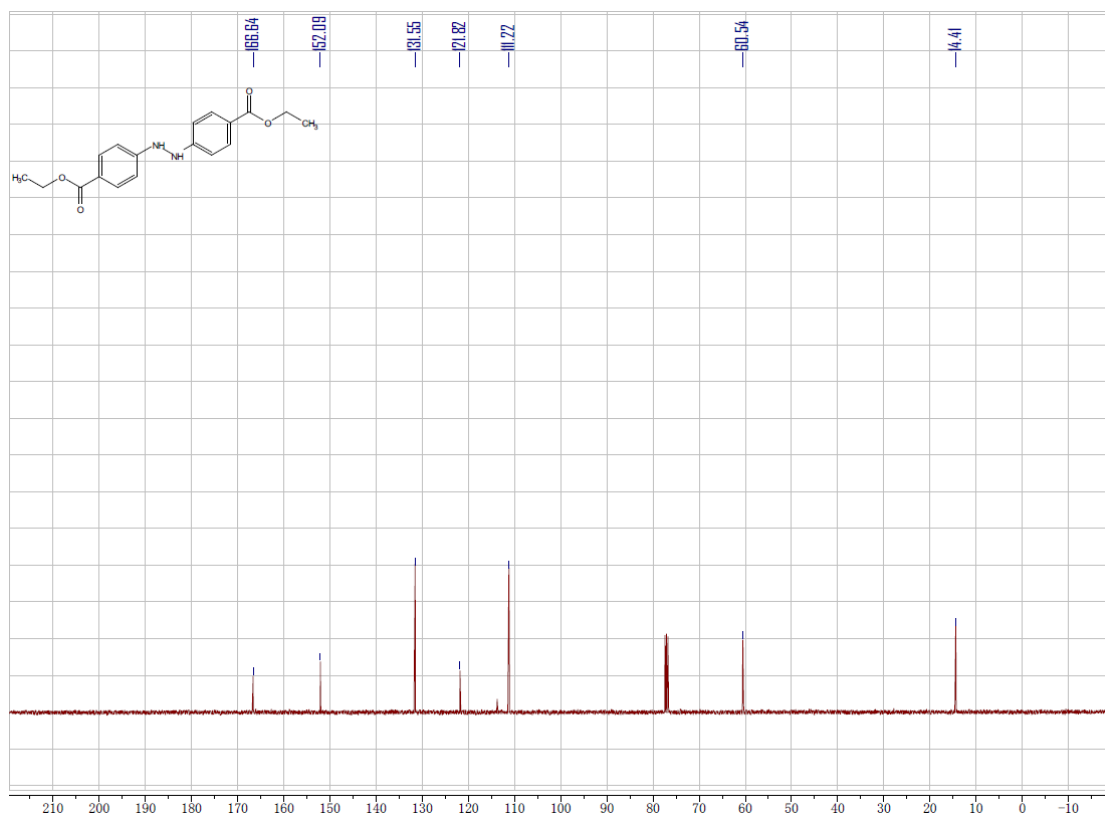

Figure S37.  $^{13}\text{C}$  NMR Spectrum of **3r**

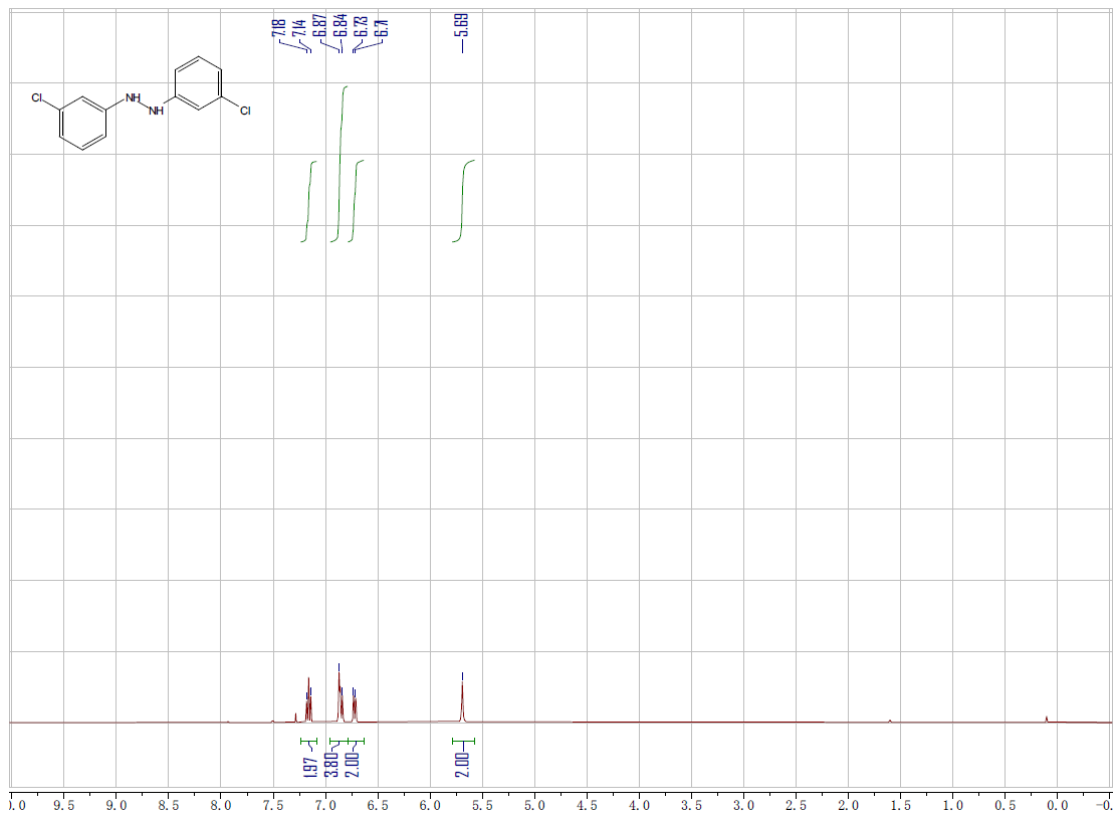

Figure S38.  $^1\text{H}$  NMR Spectrum of **3s**

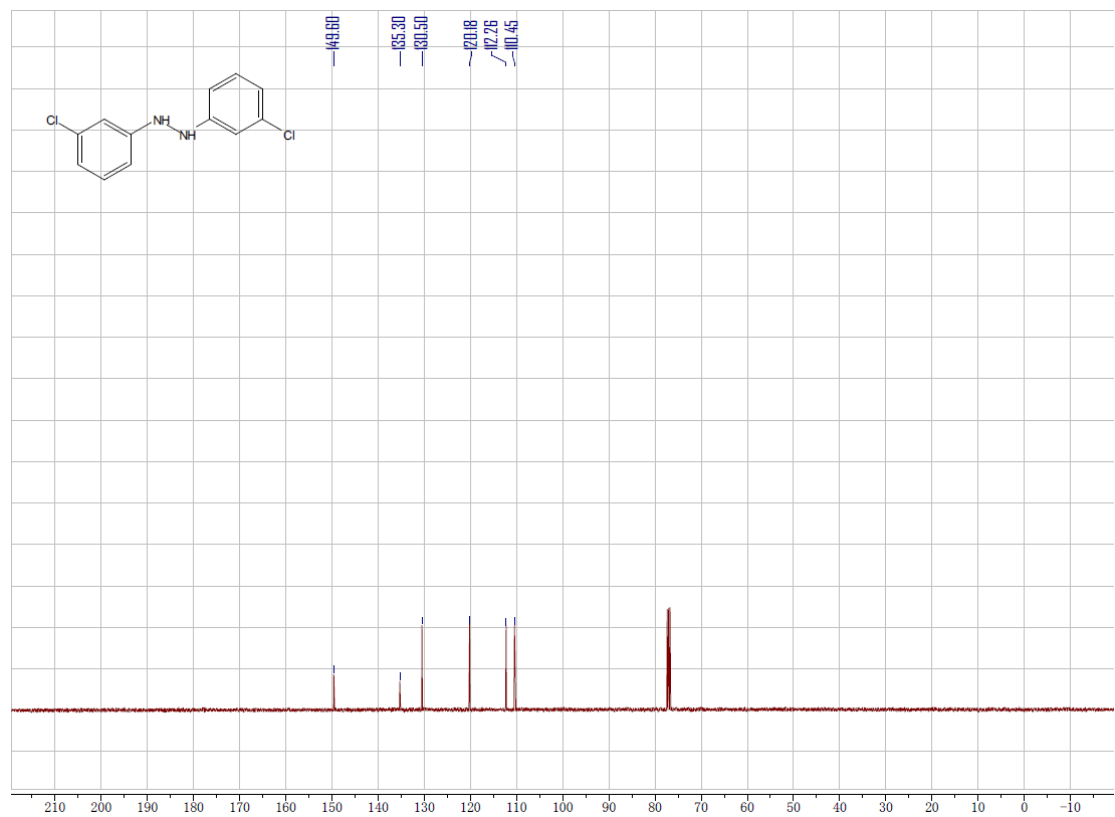

Figure S39.  $^{13}\text{C}$  NMR Spectrum of **3s**

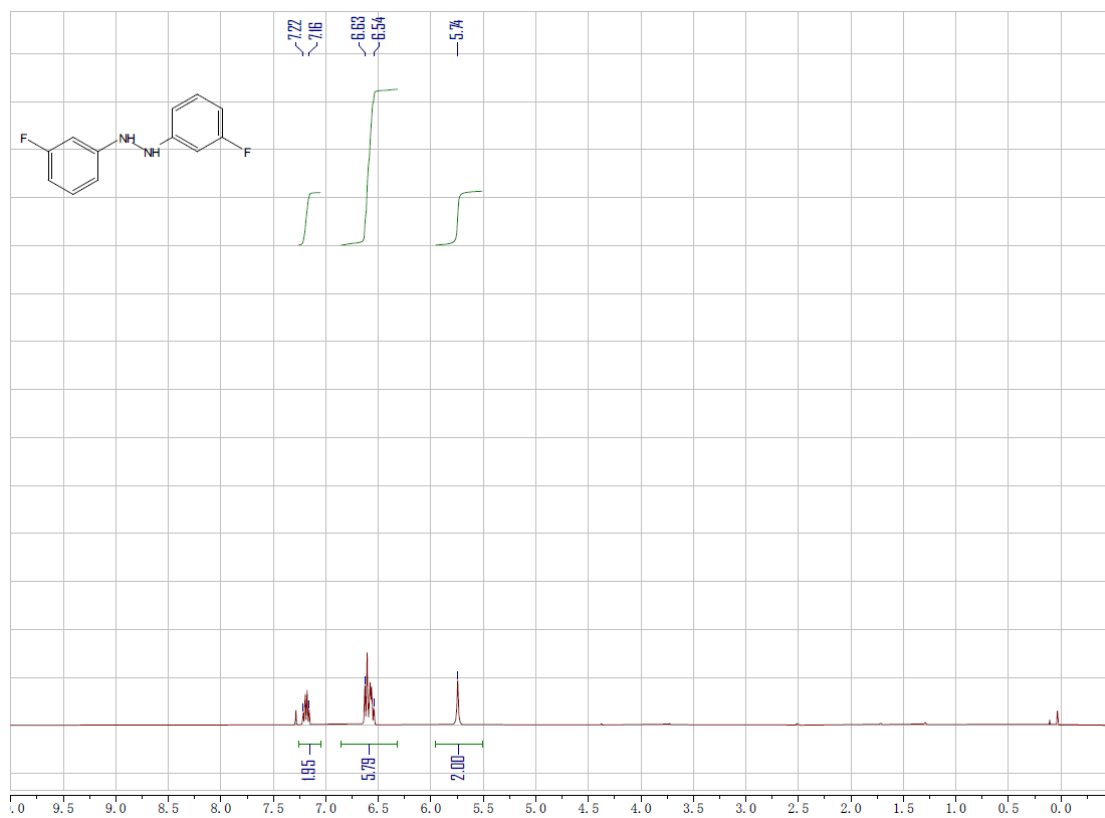

Figure S40.  $^1\text{H}$  NMR Spectrum of **3t**

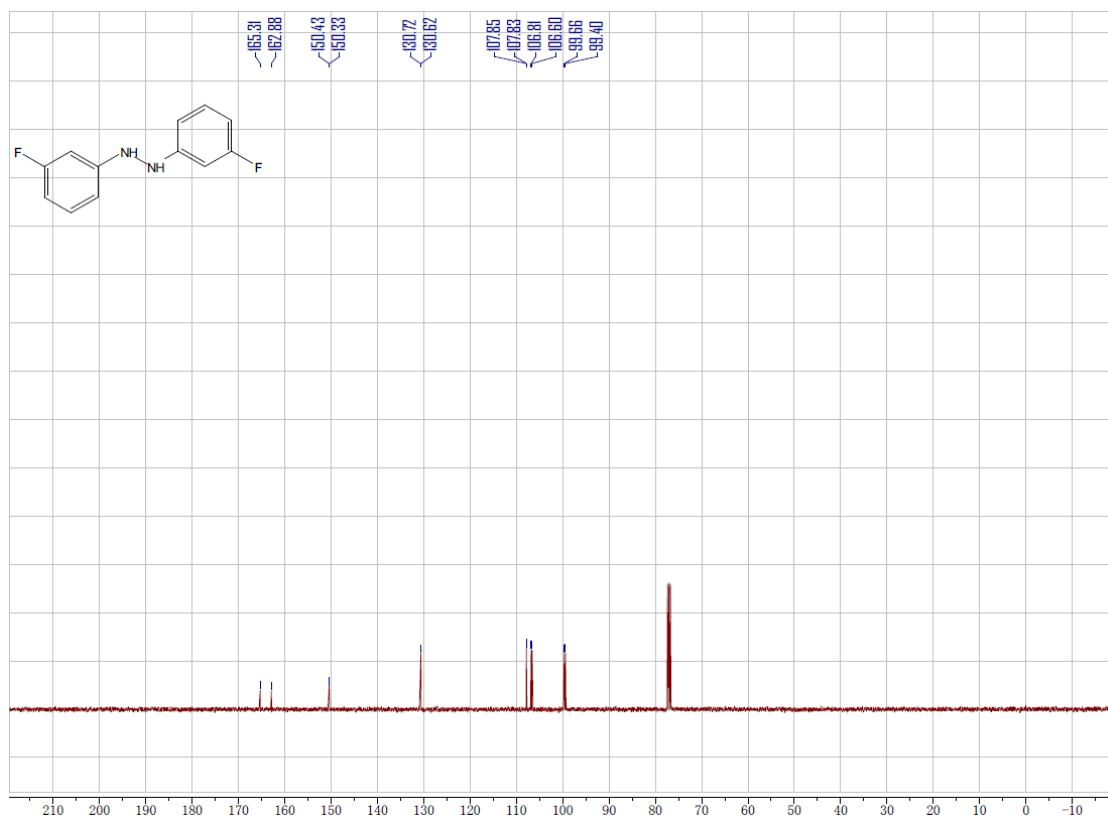

Figure S41.  $^{13}\text{C}$  NMR Spectrum of **3t**

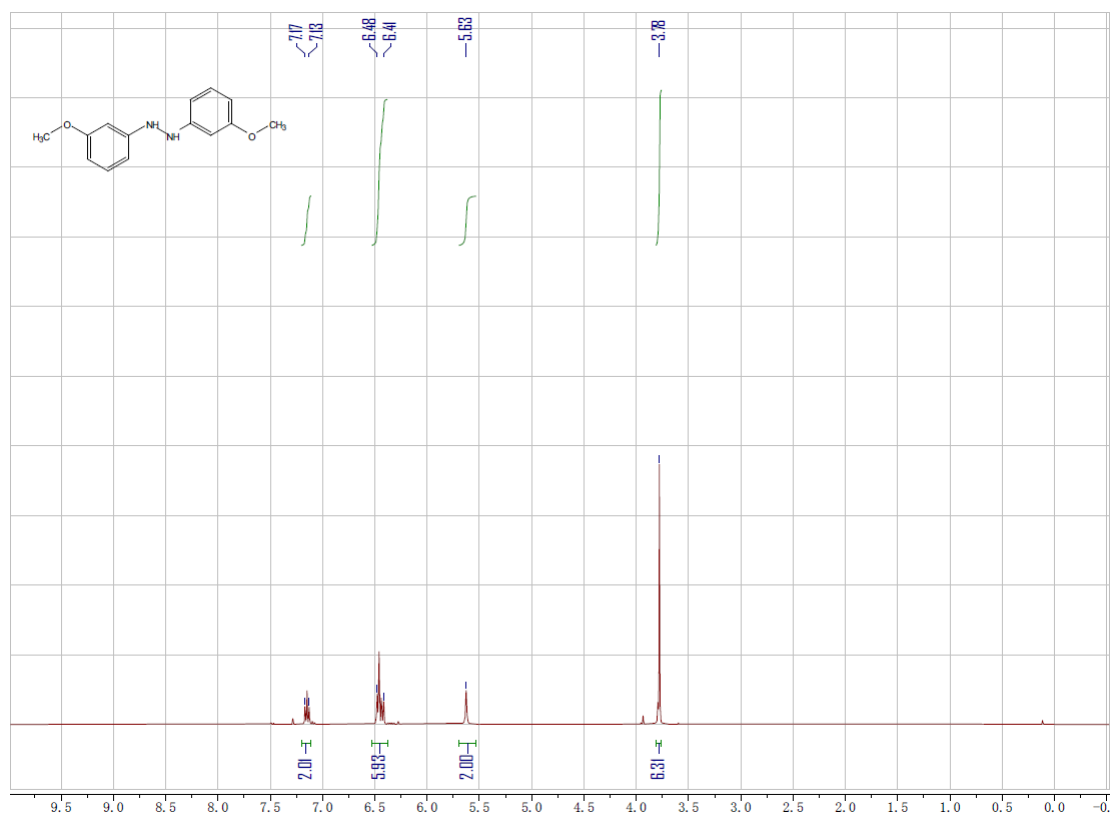

Figure S42.  $^1\text{H}$  NMR Spectrum of **3u**

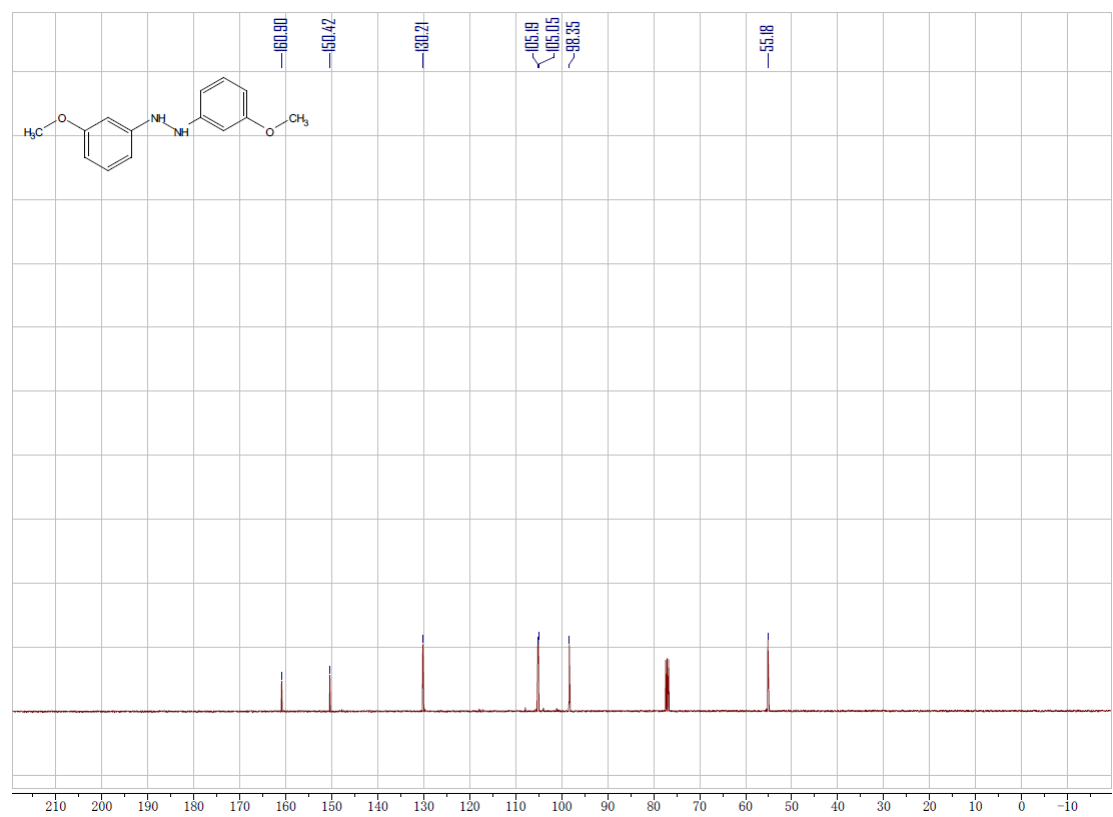

Figure S43.  $^{13}\text{C}$  NMR Spectrum of **3u**

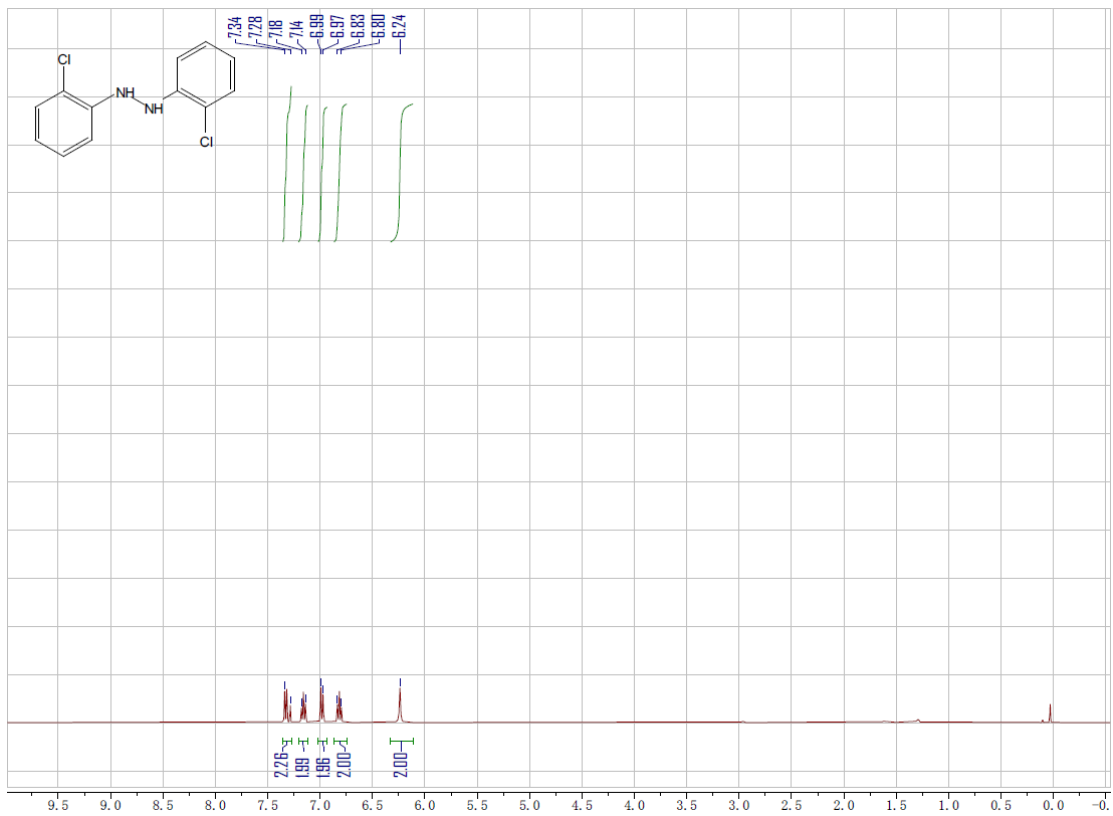

Figure S44. <sup>1</sup>H NMR Spectrum of **3v**

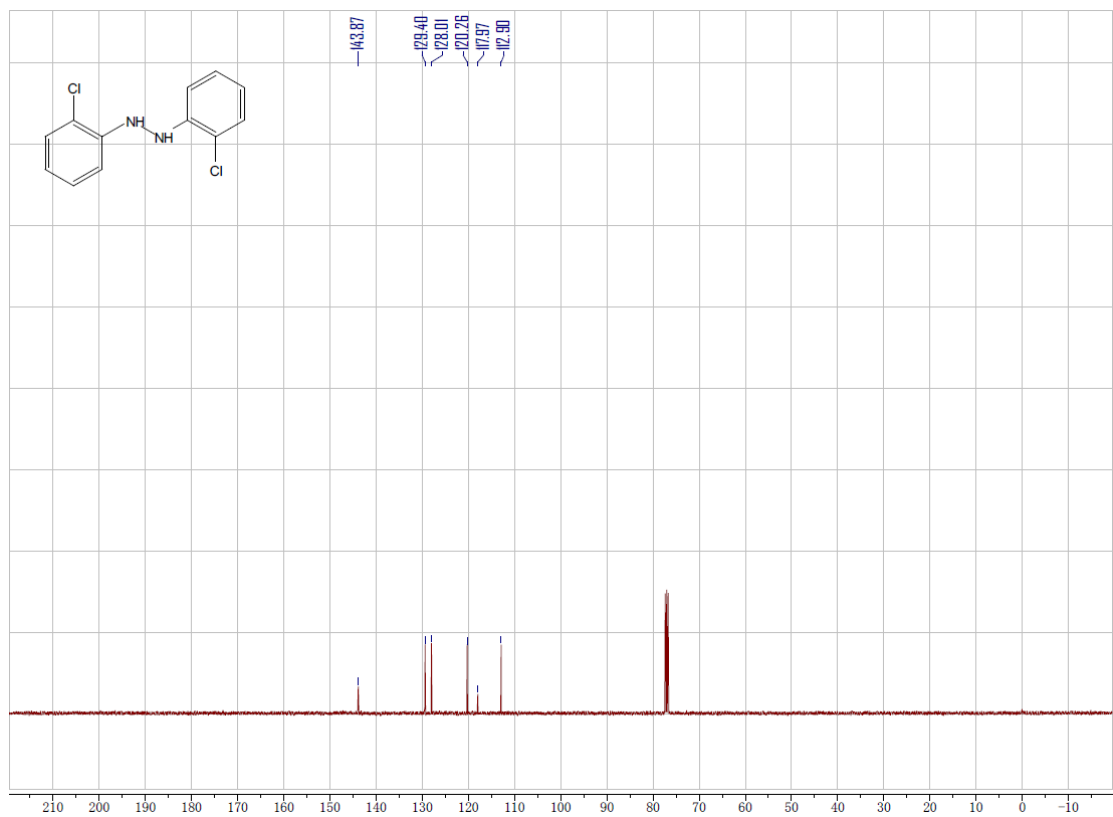

Figure S45. <sup>13</sup>C NMR Spectrum of **3v**
